# Supplementary material for: Triplet Emitting C^N^C Cyclometalated Dibenzo[c,h]Acridine Pt(II) Complexes
Source: MDPI journal article supplement (doi:10.3390/molecules27228054), 2022-11-19
Supplement: s1 [file s1]

Supplementary Materials  
for  
**Triplet emitting C<sup>N</sup>C cyclometalated dibenzo[c,h]acridine Pt(II) complexes**  
Part I

Joshua Nicolas Friedel, Maren Krause, Rose Jordan, Iván Maisuls, Dana Brünink, Dominik Schwab, Nikos L. Doltsinis,\* Cristian A. Strassert,\* Axel Klein\*

**Contents**

Supplementary Figures

**Figure S1.** Crystal structure of [Pt(dba)(CN*t*Bu)] viewed along the crystallographic *c* axis, the stacking of two molecules in the unit cell, and view on the complex molecule.

**Figure S2.** Crystal structure of [Pt(dba)(PPh<sub>3</sub>)] viewed along the crystallographic *b* axis, the stacking of two molecules in the unit cell, and view on the complex molecule.

**Figure S3.** Crystal structure of [Pt(dba)(DMSO)] viewed along the crystallographic *a* axis, the stacking of two molecules in the unit cell, and view on the complex molecule.

**Figure S4.** Crystal structure of [Pt(dba)(Me<sub>2</sub>Imd)] viewed along the crystallographic *a* and *b* axis and view on the complex molecule.

**Figure S5.** DFT-optimized *S*<sub>0</sub> ground state geometries of the complex [Pt(dba)(L)] with L = DMSO, PPh<sub>3</sub>, Me<sub>2</sub>Imd, and CN*t*Bu.

**Figure S6.** DFT-optimized *T*<sub>1</sub> excited state geometries of the complex [Pt(dba)(L)] with L = DMSO, PPh<sub>3</sub>, Me<sub>2</sub>Imd, and CN*t*Bu.

**Figure S7.** Cyclic voltammograms of [Pt(dba)(dmso)] and [Pt(db(ph)a)(dmso)] in 0.1 M *n*-Bu<sub>4</sub>NPF<sub>6</sub>/THF.

**Figure S8.** DFT-calculated energies and composition of selected frontier molecular orbitals for [Pt(dba)(L)] (L = dmso, PPh<sub>3</sub>, Me<sub>2</sub>Imd, and CN*t*Bu) at the optimized ground state *S*<sub>0</sub> geometry.

**Figure S9.** UV-vis absorption spectra of [Pt(dba)(L)] (L = dmso, PPh<sub>3</sub>, CN*t*Bu and Me<sub>2</sub>Imd) in CH<sub>2</sub>Cl<sub>2</sub>.

**Figure S10.** Normalized photoluminescence spectra of the [Pt(dba)L] complexes in CH<sub>2</sub>Cl<sub>2</sub> at 298 K.

**Figure S11.** Normalized excitation (dotted line) and emission (continuous line) spectra of [Pt(dba)(dmso)] in a CH<sub>2</sub>Cl<sub>2</sub>/MeOH 1:1 glassy matrix at 77 K.

**Figure S12.** Normalized excitation (dotted line) and emission (continuous line) spectra of [Pt(dba)(PPh<sub>3</sub>)] in a CH<sub>2</sub>Cl<sub>2</sub>/MeOH 1:1 glassy matrix at 77 K.

**Figure S13.** Normalized excitation (dotted line) and emission (continuous line) spectra of [Pt(dba)(CN*t*Bu)] in a CH<sub>2</sub>Cl<sub>2</sub>/MeOH 1:1 glassy matrix at 77 K.

**Figure S14.** Normalized excitation (dotted line) and emission (continuous line) spectra of [Pt(dba)(Me<sub>2</sub>Imd)] in a CH<sub>2</sub>Cl<sub>2</sub>/MeOH 1:1 glassy matrix at 77 K.

**Figure S15.** Left: Time-resolved photoluminescence of [Pt(dba)(dmso)] in an air-equilibrated CH<sub>2</sub>Cl<sub>2</sub> solution at 298 K (*c* = 10<sup>-5</sup> M), including the residuals ( $\lambda_{\text{ex}}$  = 376 nm,  $\lambda_{\text{em}}$  = 600 nm). Right: Fitting parameters including pre-exponential factors and confidence limits.

**Figure S16.** Left: Time-resolved photoluminescence of [Pt(dba)(dmso)] in an Ar-purged CH<sub>2</sub>Cl<sub>2</sub> solution at 298 K (*c* = 10<sup>-5</sup> M), including the residuals ( $\lambda_{\text{ex}}$  = 376 nm,  $\lambda_{\text{em}}$  = 600 nm). Right: Fitting parameters including pre-exponential factors and confidence limits.

**Figure S17.** Left: Time-resolved photoluminescence of [Pt(dba)(dmso)] in a frozen CH<sub>2</sub>Cl<sub>2</sub>/MeOH glassy matrix at 77 K (*c* = 10<sup>-5</sup> M), including the residuals ( $\lambda_{\text{ex}}$  = 376 nm,  $\lambda_{\text{em}}$  = 600 nm). Right: Fitting parameters including pre-exponential factors and confidence limits.

**Figure S18.** Left: Time-resolved photoluminescence of [Pt(dba)(PPh<sub>3</sub>)] in an air-equilibrated CH<sub>2</sub>Cl<sub>2</sub> solution at 298 K (*c* = 10<sup>-5</sup> M), including the residuals ( $\lambda_{\text{ex}}$  = 376 nm,  $\lambda_{\text{em}}$  = 600 nm). Right: Fitting parameters including pre-exponential factors and confidence limits.

**Figure S19.** Left: Time-resolved photoluminescence of [Pt(dba)(PPh<sub>3</sub>)] in an Ar-purged CH<sub>2</sub>Cl<sub>2</sub> solution at 298 K (*c* = 10<sup>-5</sup> M), including the residuals ( $\lambda_{\text{ex}}$  = 376 nm,  $\lambda_{\text{em}}$  = 600 nm). Right: Fitting parameters including pre-exponential factors and confidence limits.

**Figure S20.** Left: Time-resolved photoluminescence of [Pt(dba)(PPh<sub>3</sub>)] in a frozen CH<sub>2</sub>Cl<sub>2</sub>/MeOH glassy matrix at 77 K (*c* = 10<sup>-5</sup> M), including the residuals ( $\lambda_{\text{ex}}$  = 376 nm,  $\lambda_{\text{em}}$  = 600 nm). Right: Fitting parameters including pre-exponential factors and confidence limits.

**Figure S21.** Left: Time-resolved photoluminescence of [Pt(dba)(CN*t*Bu)] in an air-equilibrated CH<sub>2</sub>Cl<sub>2</sub> solution at 298 K (*c* = 10<sup>-5</sup> M), including the residuals ( $\lambda_{\text{ex}}$  = 376 nm,  $\lambda_{\text{em}}$  = 600 nm). Right: Fitting parameters including pre-exponential factors and confidence limits.

**Figure S22.** Left: Time-resolved photoluminescence of [Pt(dba)(CN*t*Bu)] in an Ar-purged CH<sub>2</sub>Cl<sub>2</sub> solution at 298 K (*c* = 10<sup>-5</sup> M), including the residuals ( $\lambda_{\text{ex}}$  = 376 nm,  $\lambda_{\text{em}}$  = 600 nm). Right: Fitting parameters including pre-exponential factors and confidence limits.

**Figure S23.** Left: Time-resolved photoluminescence of [Pt(dba)(CN*t*Bu)] in a frozen CH<sub>2</sub>Cl<sub>2</sub>/MeOH glassy matrix at 77 K (*c* = 10<sup>-5</sup> M), including the residuals ( $\lambda_{\text{ex}}$  = 376 nm,  $\lambda_{\text{em}}$  = 600 nm). Right: Fitting parameters including pre-exponential factors and confidence limits.

**Figure S24.** Left: Time-resolved photoluminescence of [Pt(dba)(Me<sub>2</sub>Imd)] in an air-equilibrated CH<sub>2</sub>Cl<sub>2</sub> solution at 298 K (*c* = 10<sup>-5</sup> M), including the residuals ( $\lambda_{\text{ex}}$  = 376 nm,  $\lambda_{\text{em}}$  = 600 nm). Right: Fitting parameters including pre-exponential factors and confidence limits.

**Figure S25.** Left: Time-resolved photoluminescence of [Pt(dba)(Me<sub>2</sub>Imd)] in an Ar-purged CH<sub>2</sub>Cl<sub>2</sub> solution at 298 K (*c* = 10<sup>-5</sup> M), including the residuals ( $\lambda_{\text{ex}}$  = 376 nm,  $\lambda_{\text{em}}$  = 600 nm). Right: Fitting parameters including pre-exponential factors and confidence limits.

**Figure S26.** Left: Time-resolved photoluminescence of [Pt(dba)(Me<sub>2</sub>Imd)] in a frozen CH<sub>2</sub>Cl<sub>2</sub>/MeOH glassy matrix at 77 K (*c* = 10<sup>-5</sup> M), including the residuals ( $\lambda_{\text{ex}}$  = 376 nm,  $\lambda_{\text{em}}$  = 600 nm). Right: Fitting parameters including pre-exponential factors and confidence limits.

**Figure S27.** UV-vis absorption spectra of [Pt(dba)(dmso)] in THF/*n*-Bu<sub>4</sub>NPF<sub>6</sub>, recorded before and after cathodic reduction and before and after anodic oxidation.

**Figure S28.** UV-vis absorption spectra of [Pt(dba)(PPh<sub>3</sub>)] in THF/*n*-Bu<sub>4</sub>NPF<sub>6</sub>, recorded before and after cathodic reduction and before and after anodic oxidation.

**Figure S29.** UV-vis absorption spectra of [Pt(dba)(CN*t*Bu)] in THF/*n*-Bu<sub>4</sub>NPF<sub>6</sub>, recorded before and after cathodic reduction and before and after anodic oxidation.

**Figure S30.** UV-vis absorption spectra of [Pt(dba)(Me<sub>2</sub>Imd)] in THF/*n*-Bu<sub>4</sub>NPF<sub>6</sub>, recorded before and after cathodic reduction and before and after anodic oxidation.

## Supplementary Tables

**Table S1.** Selected structure solution and refinement data for [Pt(dba)(Me<sub>2</sub>Imd)], [Pt(dba)(CN*t*Bu)], [Pt(dba)(PPh<sub>3</sub>)] and [Pt(dba)(dmso)].

**Table S2.** Selected experimental structural data of [Pt(dba)(Me<sub>2</sub>Imd)], [Pt(dba)(CN*t*Bu)], [Pt(dba)(PPh<sub>3</sub>)], and [Pt(dba)(dmso)].

**Table S3.** Electrochemical data of the Pt complexes.

**Table S4.** Experimental long-wavelength absorption maxima of the [Pt(dba)(L)] complexes.

**Table S5.** Selected absorption maxima of the oxidized, parent, and reduced [Pt(dba)(L)]<sup>+0/-</sup> complexes.

## Supplementary Figures

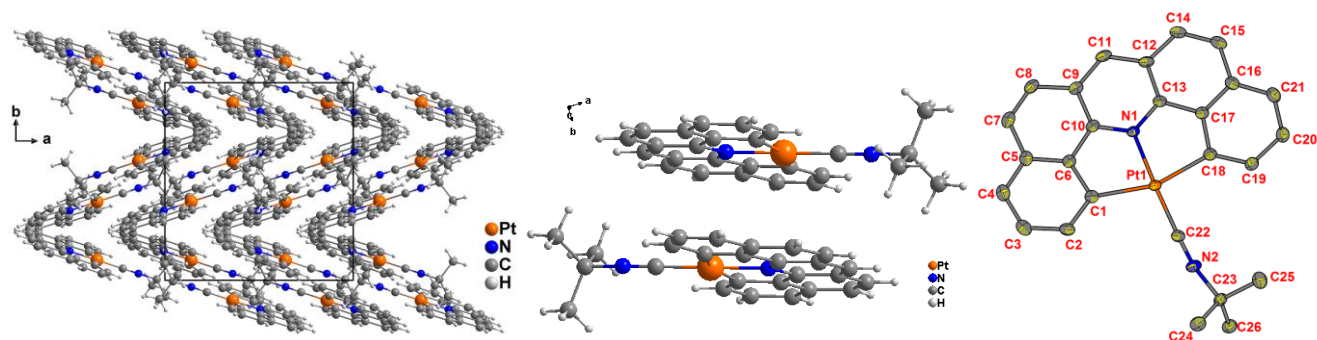

**Figure S1.** Crystal structure of [Pt(dba)(CNtBu)] viewed along the crystallographic *c* axis (left), the stacking of two molecules in the unit cell (center) and view on the complex molecule (right) with ellipsoids at 50% probability with numbering, H atoms were omitted for clarity.

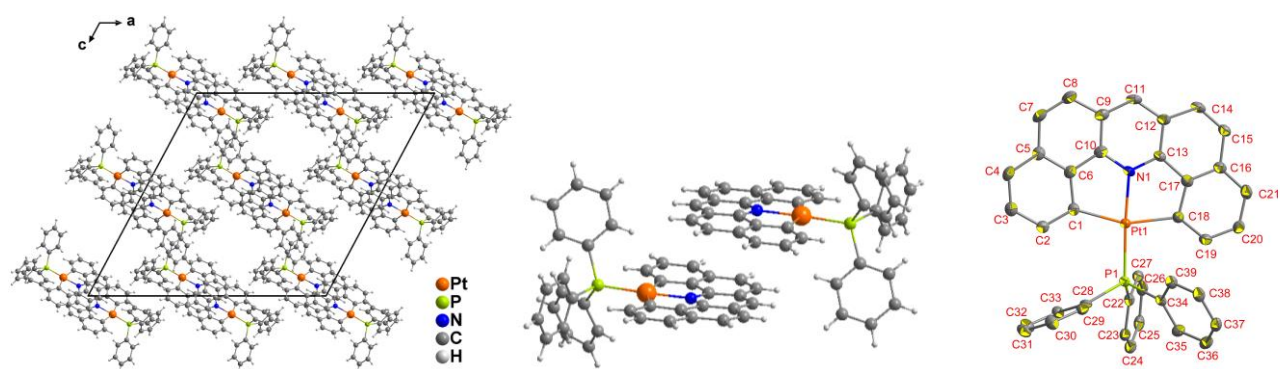

**Figure S2.** Crystal structure of [Pt(dba)(PPh<sub>3</sub>)] viewed along the crystallographic *b* axis (left), the stacking of two molecules in the unit cell (center) and view on the complex molecule (right) with ellipsoids at 50% probability with numbering, H atoms were omitted for clarity.

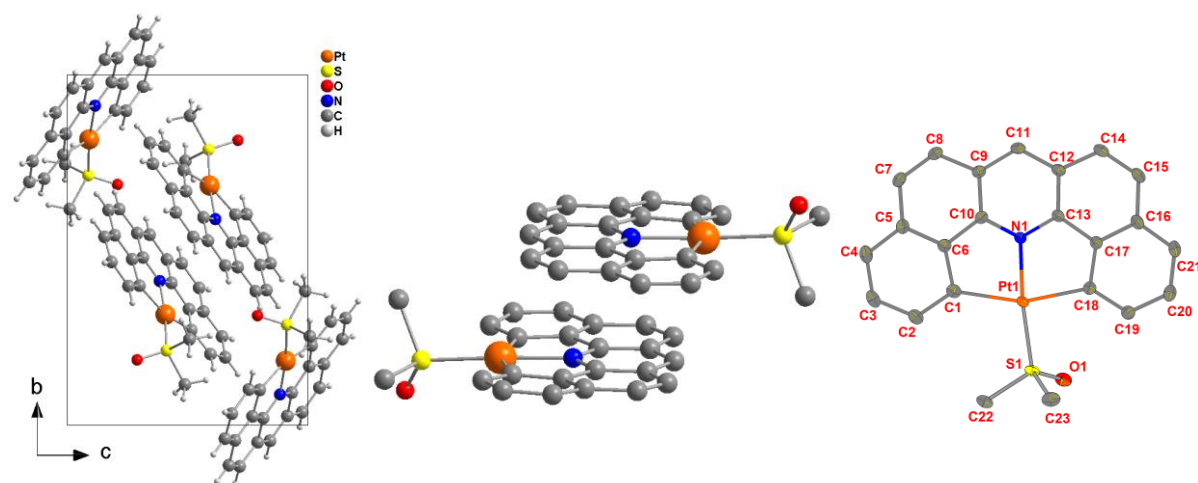

**Figure S3.** Crystal structure of [Pt(dba)(DMSO)] viewed along the crystallographic *a* axis (left), the stacking of two molecules in the unit cell (center) and view on the complex molecule (right) with ellipsoids at 50% probability with numbering, H atoms were omitted for clarity. The centroid-centroid distance for the stacking is 3.62 Å with an offset of 1.25 Å.

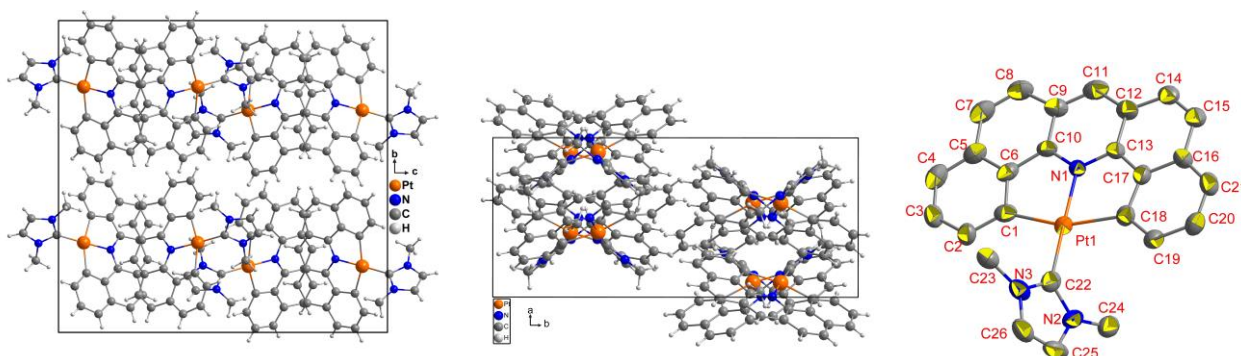

**Figure S4.** Crystal structures of [Pt(dba)(Me<sub>2</sub>Imd)] viewed along the crystallographic *a* (left) and *c* axis (center) and view on the complex molecule (right) with elipsoids at 50% probability with numbering, H atoms were omitted for clarity.

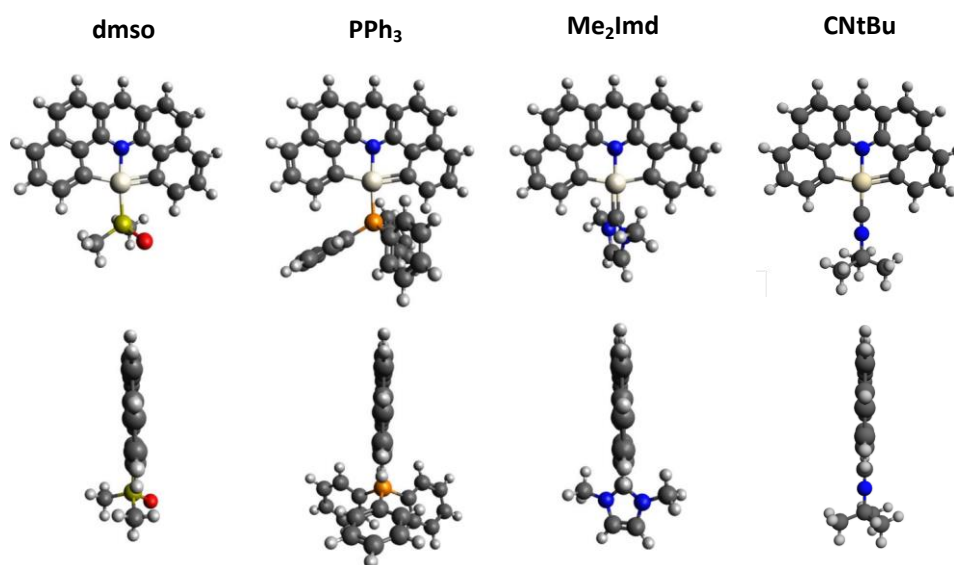

**Figure S5.** DFT-optimized *S*<sub>0</sub> ground state geometries of the complex [Pt(dba)(L)] with L = DMSO, PPh<sub>3</sub>, Me<sub>2</sub>Imd, CNtBu in CH<sub>2</sub>Cl<sub>2</sub> in front and side view.

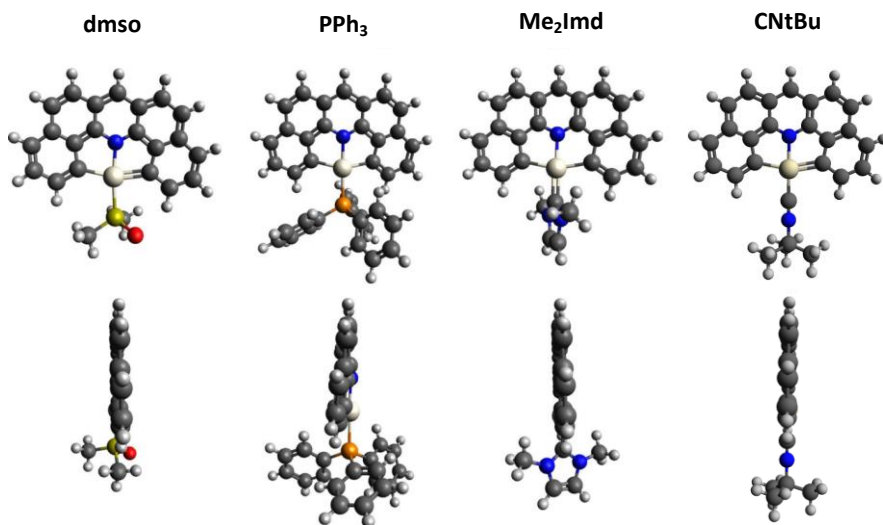

**Figure S6.** DFT-optimized *T*<sub>1</sub> excited state geometries of the complex [Pt(dba)(L)] with L = DMSO, PPh<sub>3</sub>, Me<sub>2</sub>Imd, CNtBu in CH<sub>2</sub>Cl<sub>2</sub> in front and side view.

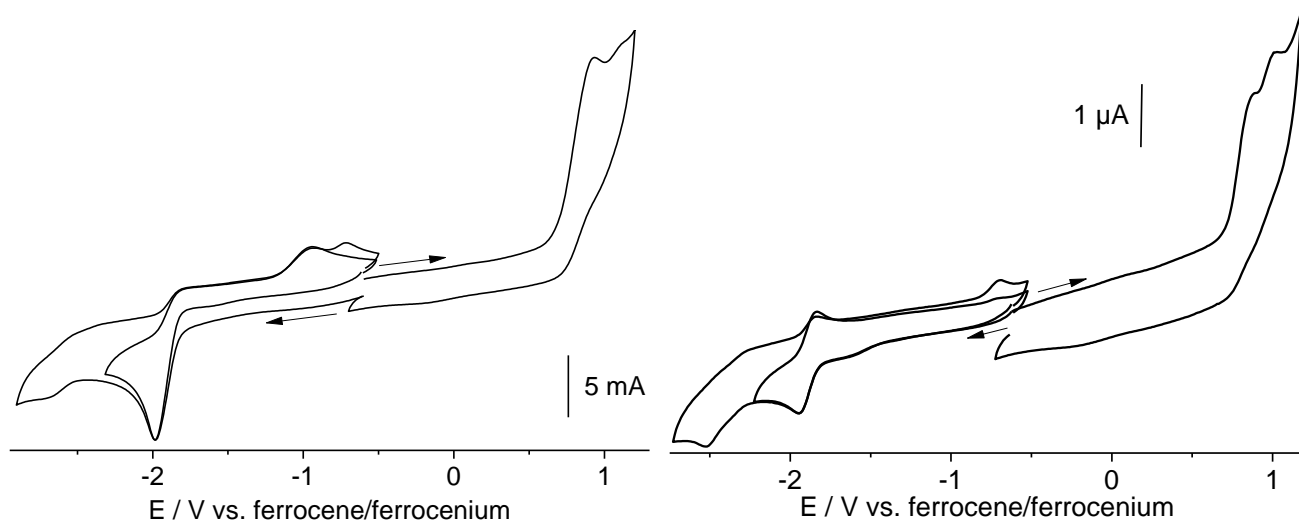

**Figure S7.** Cyclic voltammograms of [Pt(dba)(dmsO)] (left) and [Pt(db(ph)a)(dmsO)] (right) in 0.1 M *n*-Bu<sub>4</sub>NPF<sub>6</sub>/THF.

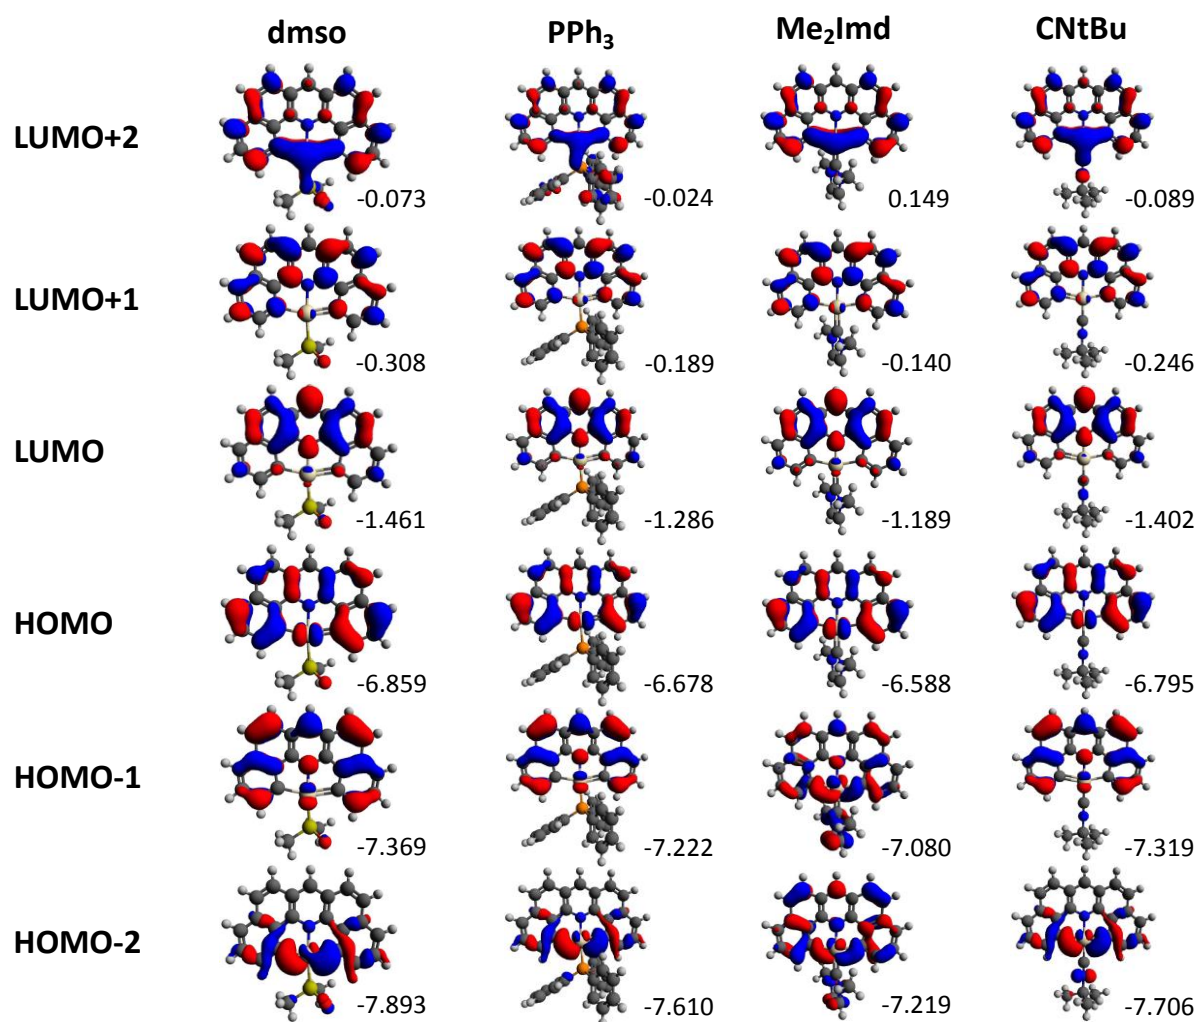

**Figure S8.** DFT-calculated energies and composition of selected frontier molecular orbitals for [Pt(dba)(L)] (L = dmsO, PPh<sub>3</sub>, Me<sub>2</sub>Imd, and CNtBu) at the optimized ground state *S*<sub>0</sub> geometry.



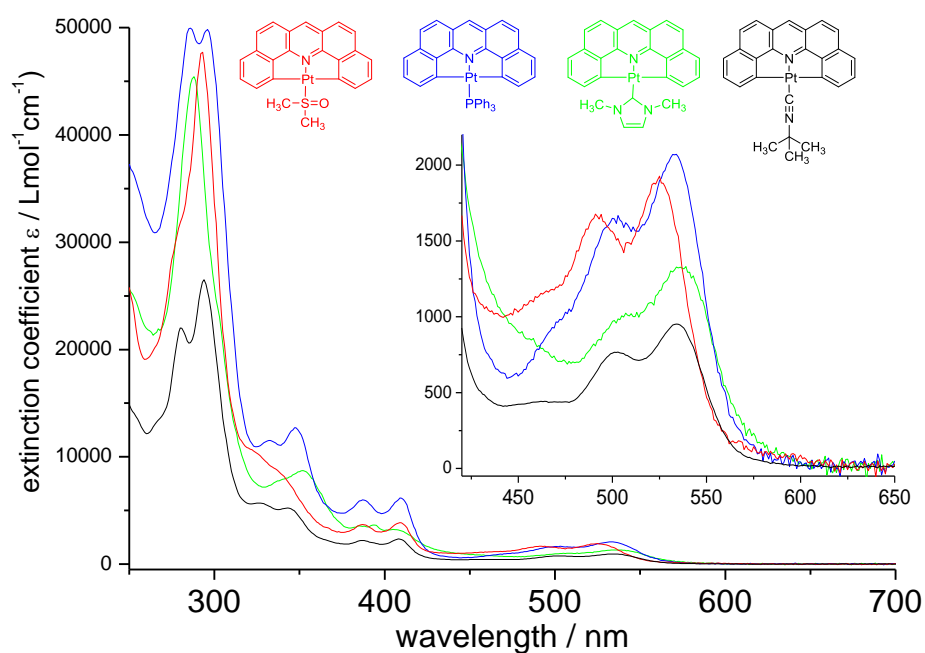

**Figure S9.** UV-vis absorption spectra of  $[\text{Pt}(\text{dba})(\text{L})]$  ( $\text{L} = \text{dmsO}$ ,  $\text{PPh}_3$ ,  $\text{CN}^t\text{Bu}$  and  $\text{Me}_2\text{Imd}$ ) in  $\text{CH}_2\text{Cl}_2$ .

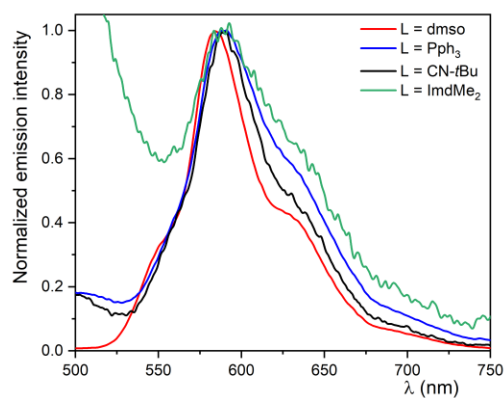

**Figure S10.** Normalized photoluminescence spectra of the  $[\text{Pt}(\text{dba})\text{L}]$  complexes in  $\text{CH}_2\text{Cl}_2$  at 298 K.

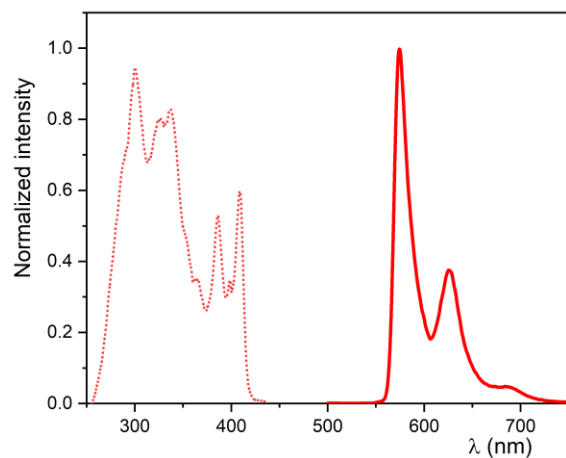

**Figure S11.** Normalized excitation (dotted line) and emission (continuous line) spectra of  $[\text{Pt}(\text{dba})(\text{dmsO})]$  in a  $\text{CH}_2\text{Cl}_2/\text{MeOH}$  1:1 glassy matrix at 77 K.

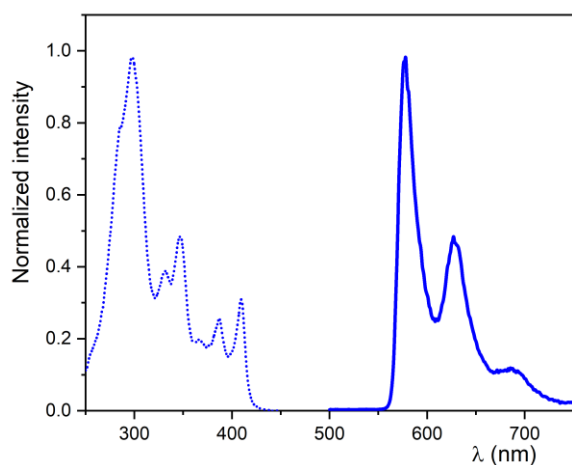

**Figure S12.** Normalized excitation (dotted line) and emission (continuous line) spectra of  $[\text{Pt}(\text{dba})(\text{PPh}_3)]$  in a  $\text{CH}_2\text{Cl}_2/\text{MeOH}$  1:1 glassy matrix at 77 K.

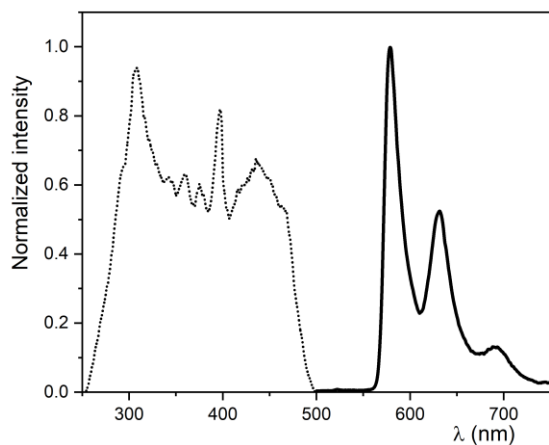

**Figure S13.** Normalized excitation (dotted line) and emission (continuous line) spectra of  $[\text{Pt}(\text{dba})(\text{CN}^t\text{Bu})]$  in a  $\text{CH}_2\text{Cl}_2/\text{MeOH}$  1:1 glassy matrix at 77 K.

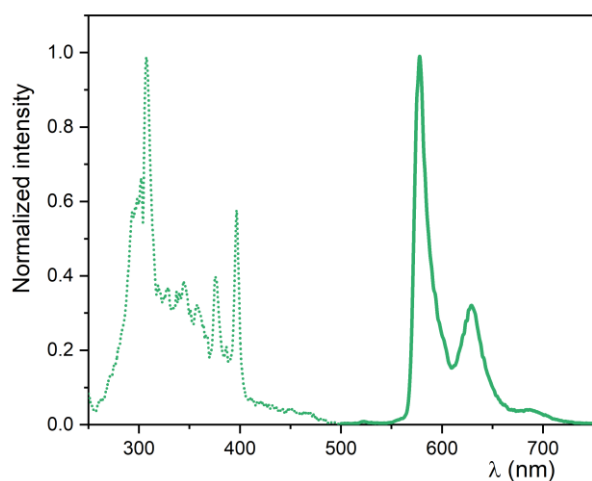

**Figure S14.** Normalized excitation (dotted line) and emission (continuous line) spectra of  $[\text{Pt}(\text{dba})(\text{Me}_2\text{Imd})]$  in a  $\text{CH}_2\text{Cl}_2/\text{MeOH}$  1:1 glassy matrix at 77 K.

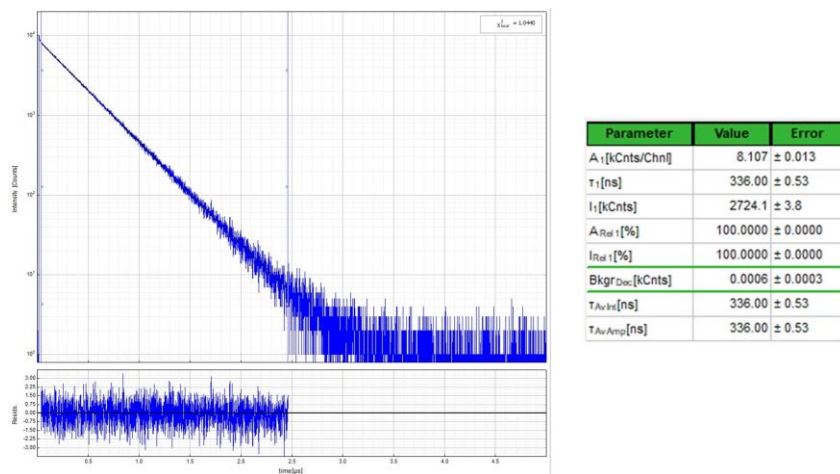

**Figure S15.** Left: Time-resolved photoluminescence of [Pt(dba)(dmsu)] in an air-equilibrated  $\text{CH}_2\text{Cl}_2$  solution at 298 K ( $c = 10^{-5}$  M), including the residuals ( $\lambda_{\text{ex}} = 376$  nm,  $\lambda_{\text{em}} = 600$  nm). Right: Fitting parameters including pre-exponential factors and confidence limits.

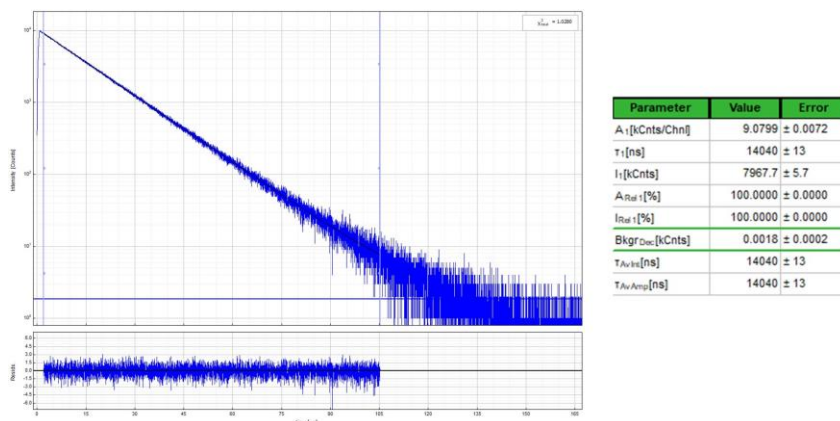

**Figure S16.** Left: Time-resolved photoluminescence of [Pt(dba)(dmsu)] in an Ar-purged  $\text{CH}_2\text{Cl}_2$  solution at 298 K ( $c = 10^{-5}$  M), including the residuals ( $\lambda_{\text{ex}} = 376$  nm,  $\lambda_{\text{em}} = 600$  nm). Right: Fitting parameters including pre-exponential factors and confidence limits.

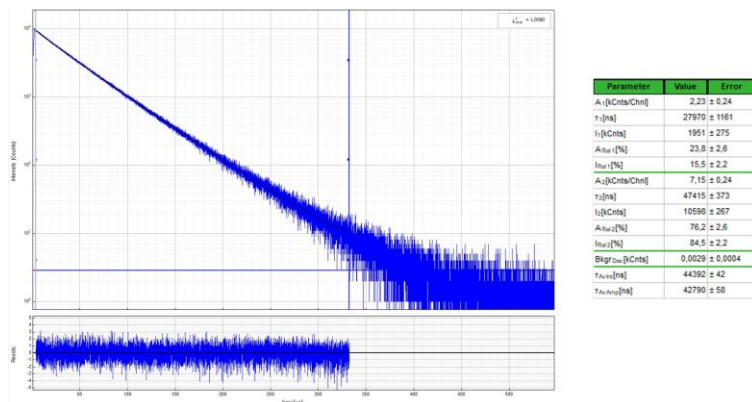

**Figure S17.** Left: Time-resolved photoluminescence of [Pt(dba)(dmsu)] in a frozen  $\text{CH}_2\text{Cl}_2/\text{MeOH}$  glassy matrix at 77 K ( $c = 10^{-5}$  M), including the residuals ( $\lambda_{\text{ex}} = 376$  nm,  $\lambda_{\text{em}} = 600$  nm). Right: Fitting parameters including pre-exponential factors and confidence limits.



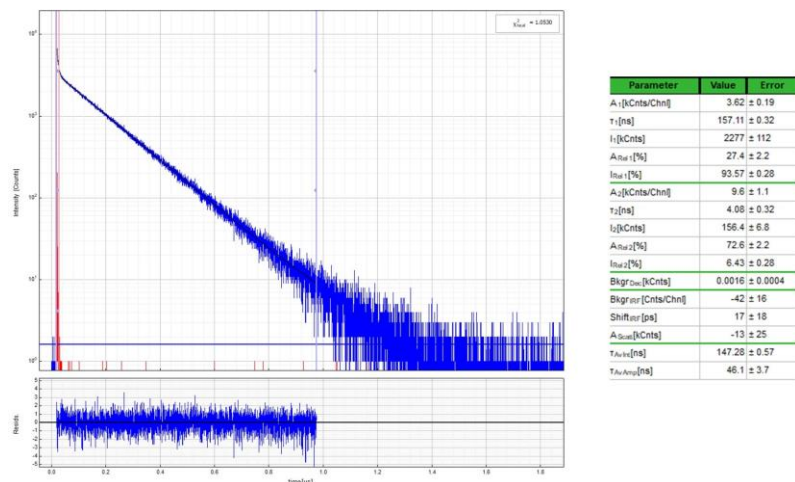

**Figure S18.** Left: Time-resolved photoluminescence of [Pt(dba)(PPh<sub>3</sub>)] in an air-equilibrated CH<sub>2</sub>Cl<sub>2</sub> solution at 298 K ( $c = 10^{-5}$  M), including the residuals ( $\lambda_{ex} = 376$  nm,  $\lambda_{em} = 600$  nm). Right: Fitting parameters including pre-exponential factors and confidence limits.

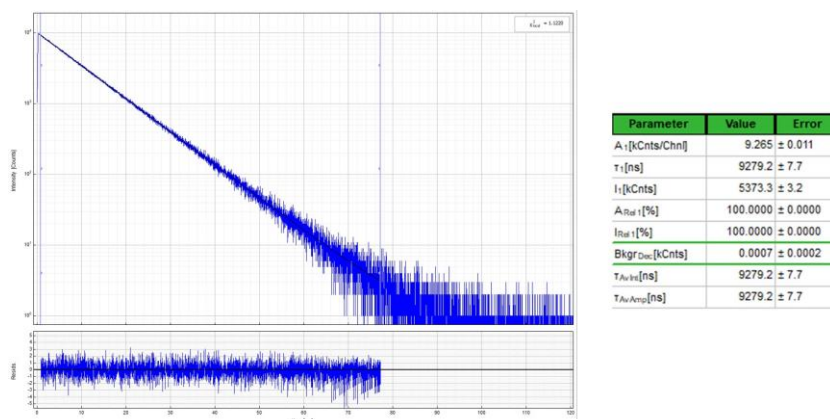

**Figure S19.** Left: Time-resolved photoluminescence of [Pt(dba)(PPh<sub>3</sub>)] in an Ar-purged CH<sub>2</sub>Cl<sub>2</sub> solution at 298 K ( $c = 10^{-5}$  M), including the residuals ( $\lambda_{ex} = 376$  nm,  $\lambda_{em} = 600$  nm). Right: Fitting parameters including pre-exponential factors and confidence limits.

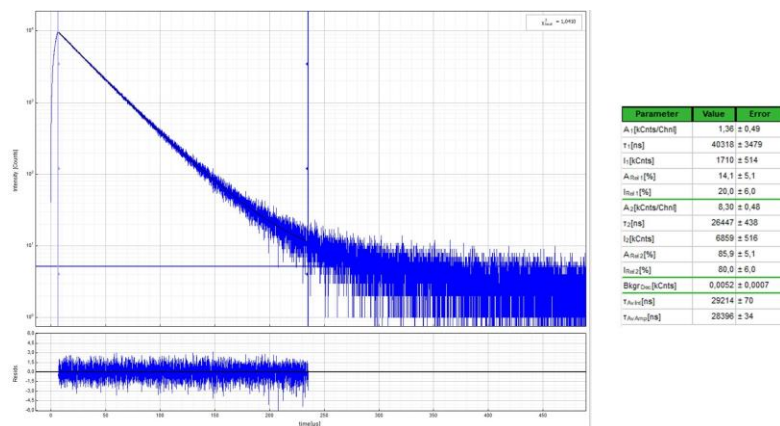

**Figure S20.** Left: Time-resolved photoluminescence of [Pt(dba)(PPh<sub>3</sub>)] in a frozen CH<sub>2</sub>Cl<sub>2</sub>/MeOH glassy matrix at 77 K ( $c = 10^{-5}$  M), including the residuals ( $\lambda_{ex} = 376$  nm,  $\lambda_{em} = 600$  nm). Right: Fitting parameters including pre-exponential factors and confidence limits.

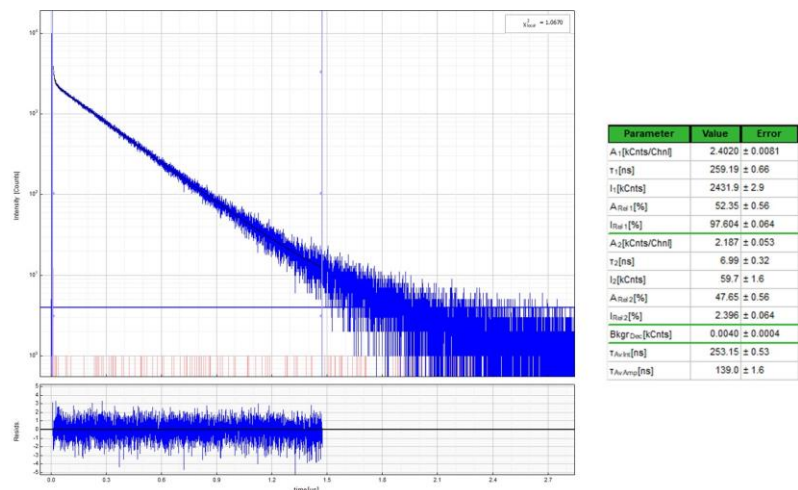

**Figure S21.** Left: Time-resolved photoluminescence of [Pt(dba)(CNtBu)] in an air-equilibrated CH<sub>2</sub>Cl<sub>2</sub> solution at 298 K ( $c = 10^{-5}$  M), including the residuals ( $\lambda_{\text{ex}} = 376$  nm,  $\lambda_{\text{em}} = 600$  nm). Right: Fitting parameters including pre-exponential factors and confidence limits.

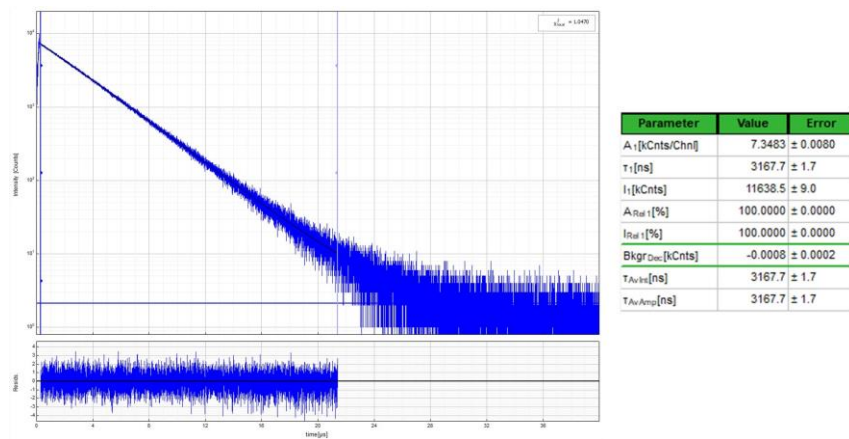

**Figure S22.** Left: Time-resolved photoluminescence of [Pt(dba)(CNtBu)] in an Ar-purged CH<sub>2</sub>Cl<sub>2</sub> solution at 298 K ( $c = 10^{-5}$  M), including the residuals ( $\lambda_{\text{ex}} = 376$  nm,  $\lambda_{\text{em}} = 600$  nm). Right: Fitting parameters including pre-exponential factors and confidence limits.

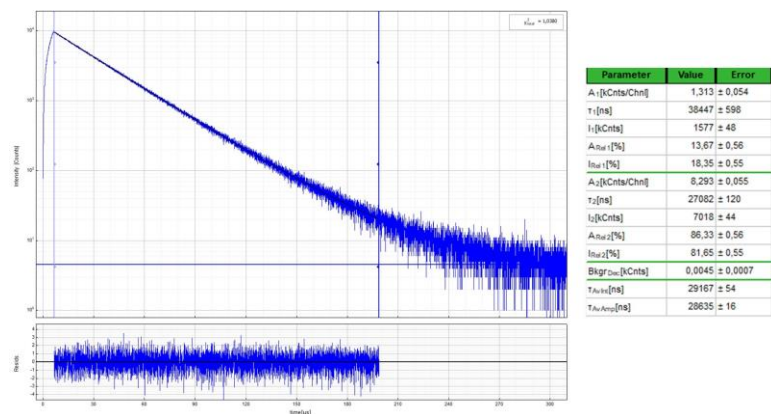

**Figure S23.** Left: Time-resolved photoluminescence of [Pt(dba)(CNtBu)] in a frozen CH<sub>2</sub>Cl<sub>2</sub>/MeOH glassy matrix at 77 K ( $c = 10^{-5}$  M), including the residuals ( $\lambda_{\text{ex}} = 376$  nm,  $\lambda_{\text{em}} = 600$  nm). Right: Fitting parameters including pre-exponential factors and confidence limits.

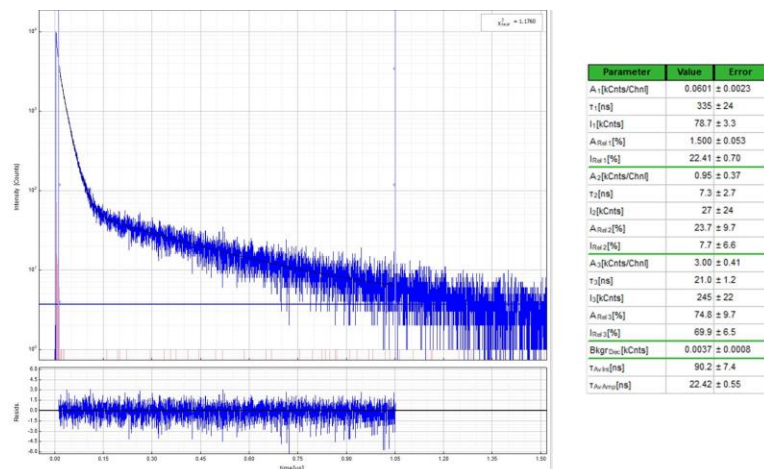

**Figure S24.** Left: Time-resolved photoluminescence of [Pt(dba)(Me<sub>2</sub>Imd)] in an air-equilibrated CH<sub>2</sub>Cl<sub>2</sub> solution at 298 K ( $c = 10^{-5}$  M), including the residuals ( $\lambda_{\text{ex}} = 376$  nm,  $\lambda_{\text{em}} = 600$  nm). Right: Fitting parameters including pre-exponential factors and confidence limits.

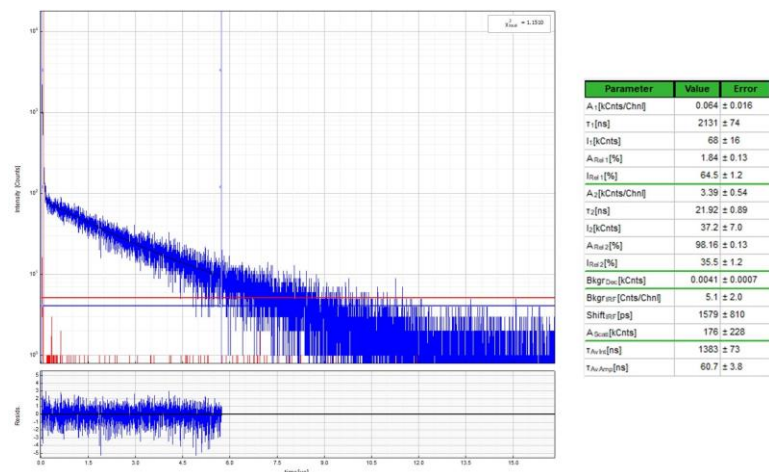

**Figure S25.** Left: Time-resolved photoluminescence of [Pt(dba)(Me<sub>2</sub>Imd)] in an Ar-purged CH<sub>2</sub>Cl<sub>2</sub> solution at 298 K ( $c = 10^{-5}$  M), including the residuals ( $\lambda_{\text{ex}} = 376$  nm,  $\lambda_{\text{em}} = 600$  nm). Right: Fitting parameters including pre-exponential factors and confidence limits.

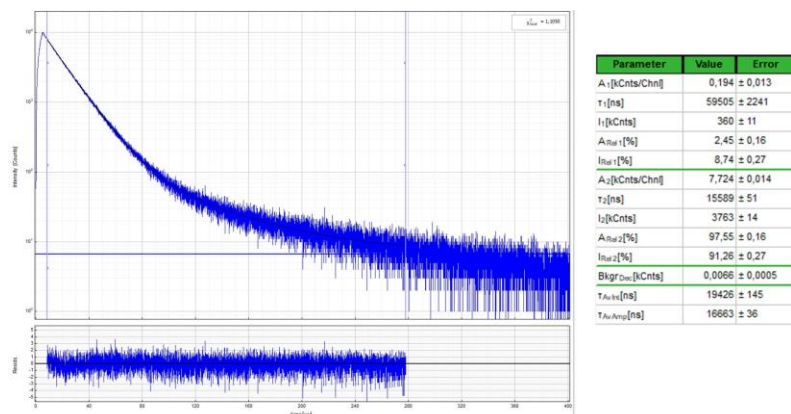

**Figure S26.** Left: Time-resolved photoluminescence of [Pt(dba)(Me<sub>2</sub>Imd)] in a frozen CH<sub>2</sub>Cl<sub>2</sub>/MeOH glassy matrix at 77 K ( $c = 10^{-5}$  M), including the residuals ( $\lambda_{\text{ex}} = 376$  nm,  $\lambda_{\text{em}} = 600$  nm). Right: Fitting parameters including pre-exponential factors and confidence limits.

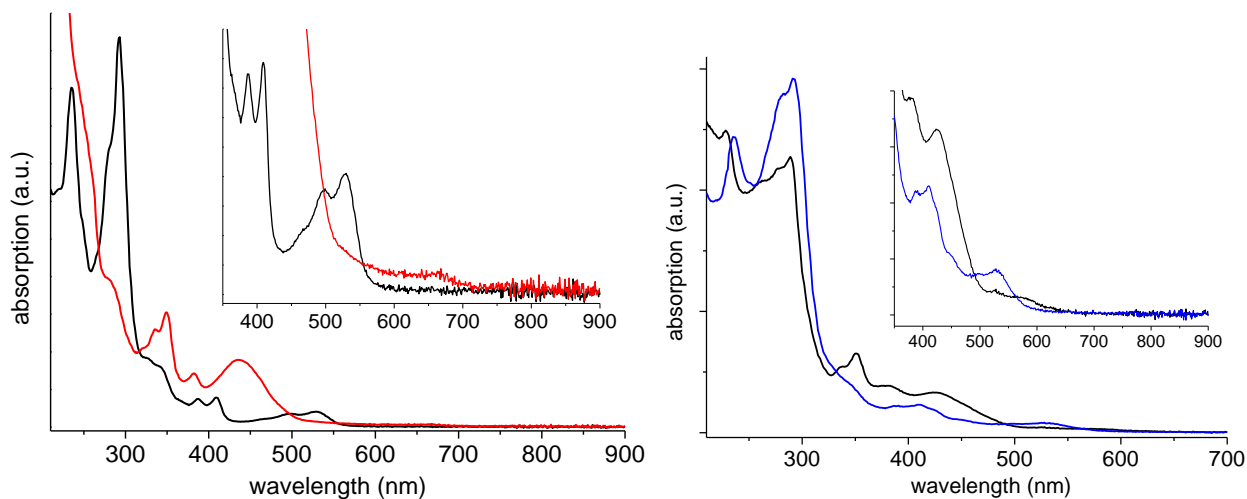

**Figure S27.** UV-vis absorption spectra of  $[\text{Pt}(\text{dba})(\text{dmsO})]$  in  $\text{THF}/n\text{-Bu}_4\text{NPF}_6$ , recorded before (black trace) and after cathodic reduction (red trace) (left) and before (black trace) and after anodic oxidation (blue trace).

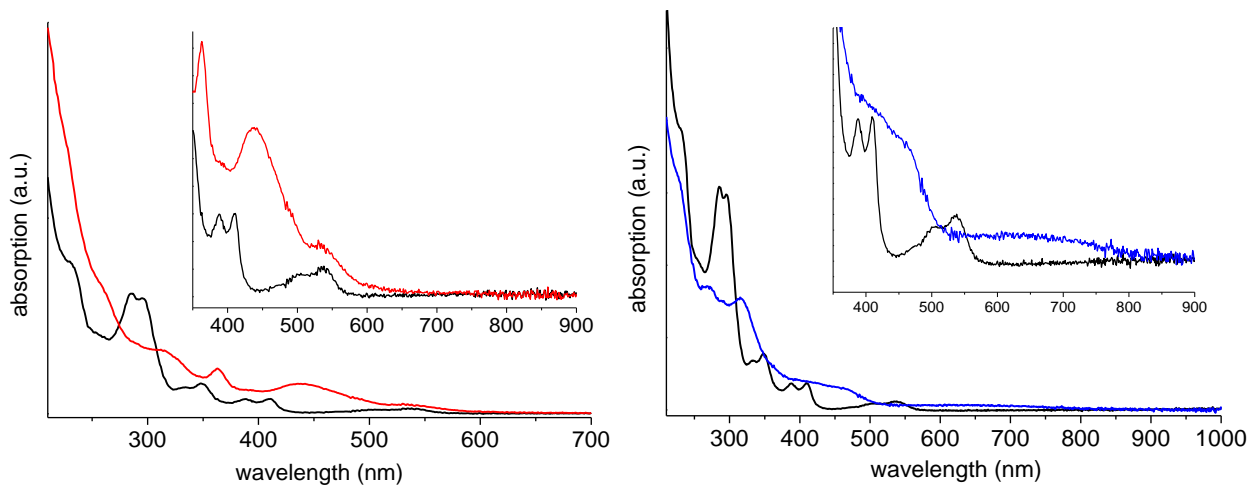

**Figure S28.** UV-vis absorption spectra of  $[\text{Pt}(\text{dba})(\text{PPh}_3)]$  in  $\text{THF}/n\text{-Bu}_4\text{NPF}_6$ , recorded before (black trace) and after cathodic reduction (red trace) (left) and before (black trace) and after anodic oxidation (blue trace).

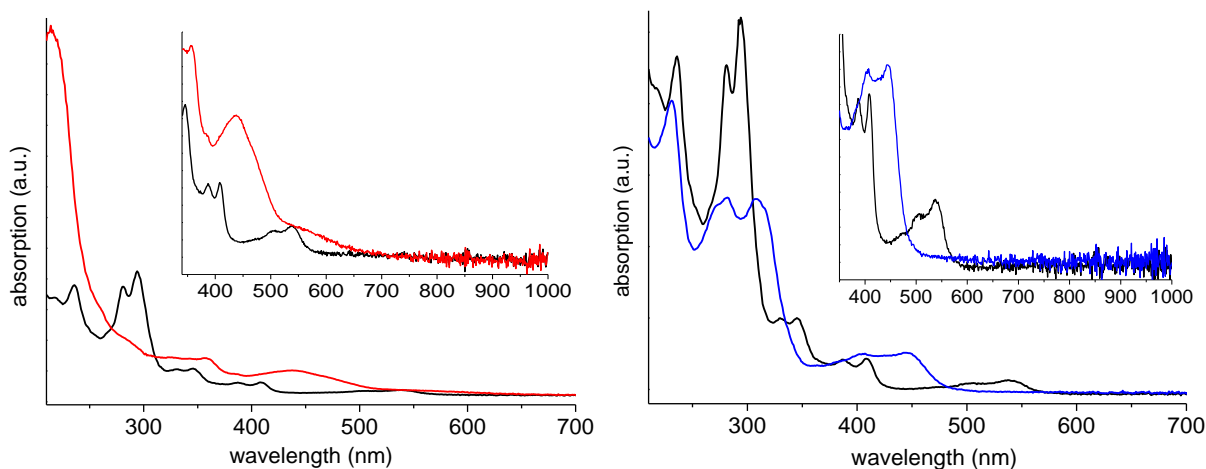

**Figure S29.** UV-vis absorption spectra of  $[\text{Pt}(\text{dba})(\text{CN}t\text{Bu})]$  in  $\text{THF}/n\text{-Bu}_4\text{NPF}_6$ , recorded before (black trace) and after cathodic reduction (red trace) (left) and before (black trace) and after anodic oxidation (blue trace) (right).

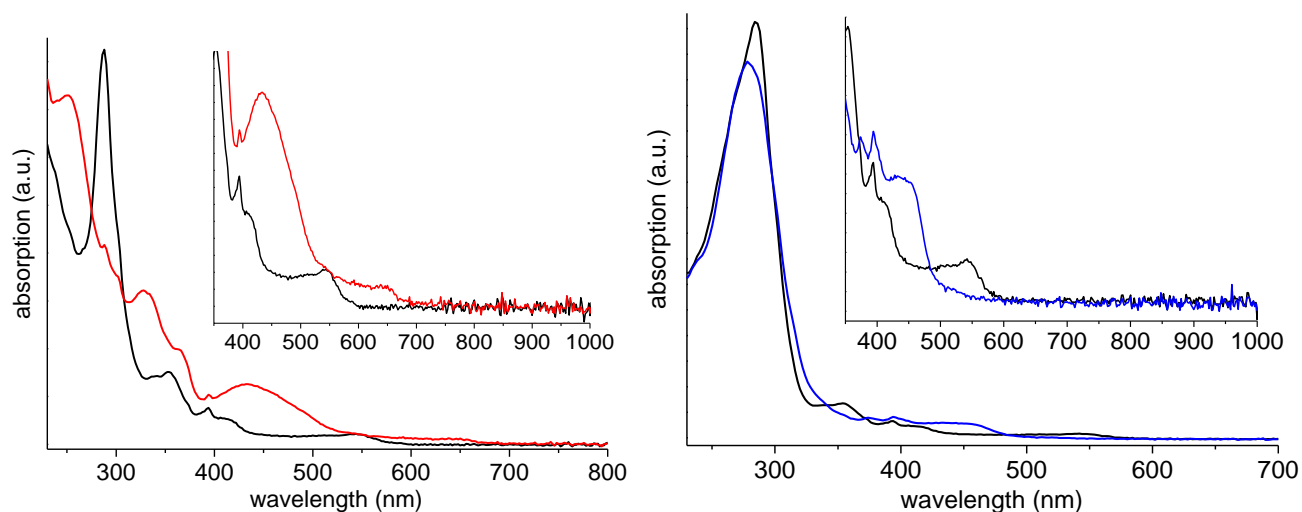

**Figure S30.** UV-vis absorption spectra of [Pt(dba)(Me<sub>2</sub>Imd)] in THF/*n*-Bu<sub>4</sub>NPF<sub>6</sub>, recorded before (black trace) and after cathodic reduction (red trace) (left) and before (black trace) and after anodic oxidation (blue trace) (right).

## Supplementary Tables

**Table S1.** Selected structure solution and refinement data for [Pt(dba)(dmsO)], [Pt(dba)(PPh<sub>3</sub>)], [Pt(dba)(CN*t*Bu)], and [Pt(dba)(Me<sub>2</sub>Imd)].<sup>a</sup>

|                                      | [Pt(dba)(dmsO)] <sup>b</sup>                                 | [Pt(dba)(PPh <sub>3</sub> )]                                 | [Pt(dba)(CN <i>t</i> Bu)]                                    | [Pt(dba)(Me <sub>2</sub> Imd)]                               |
|--------------------------------------|--------------------------------------------------------------|--------------------------------------------------------------|--------------------------------------------------------------|--------------------------------------------------------------|
| formula                              | C <sub>23</sub> H <sub>17</sub> NOSPt                        | C <sub>39</sub> H <sub>26</sub> NPPt                         | C <sub>26</sub> H <sub>20</sub> N <sub>2</sub> Pt            | C <sub>26</sub> H <sub>19</sub> N <sub>3</sub> Pt            |
| formula wt (g/mol)                   | 550.53                                                       | 734.67                                                       | 555.53                                                       | 568.53                                                       |
| T (K)                                | 100(2)                                                       | 100(2)                                                       | 100(2)                                                       | 170(2)                                                       |
| crystal system                       | monoclinic                                                   | monoclinic                                                   | orthorhombic                                                 | orthorhombic                                                 |
| space group                          | <i>P</i> 2 <sub>1</sub> /c                                   | <i>C</i> 2/c                                                 | <i>P</i> bca                                                 | <i>P</i> bca                                                 |
| cell <i>a</i> (Å)                    | 10.5597(9)                                                   | 26.920(5)                                                    | 12.8708(8)                                                   | 9.0642(3)                                                    |
| <i>b</i> (Å)                         | 15.5689(12)                                                  | 10.536(2)                                                    | 13.5052(9)                                                   | 20.6156(7)                                                   |
| <i>c</i> (Å)                         | 10.9687(9)                                                   | 26.047(5)                                                    | 22.8678(15)                                                  | 21.6365(10)                                                  |
| $\alpha$ (°)                         | 90                                                           | 90                                                           | 90                                                           | 90                                                           |
| $\beta$ (°)                          | 100.759(3)                                                   | 118.15(3)                                                    | 90                                                           | 90                                                           |
| $\gamma$ (°)                         | 90                                                           | 90                                                           | 90                                                           | 90                                                           |
| volume (Å <sup>3</sup> ) / <i>Z</i>  | 1771.6(3) / 4                                                | 6513.8(3) / 8                                                | 3974.9(4) / 8                                                | 4043.1(3) / 8                                                |
| density calc. (g/cm <sup>3</sup> )   | 2.064                                                        | 1.498                                                        | 1.857                                                        | 1.868                                                        |
| abs. coefficient (cm <sup>-1</sup> ) | 8.05                                                         | 2.386                                                        | 7.074                                                        | 6.959                                                        |
| <i>F</i> (000)                       | 1056                                                         | 2880                                                         | 2144                                                         | 2192                                                         |
| $\theta$ range data coll. (°)        | 2.3 to 33.1                                                  | 1.354 to 19.738                                              | 2.360 to 35.031                                              | 1.882 to 26.945                                              |
| index ranges                         | $-15 \leq h \leq 15, -22 \leq k \leq 22, -15 \leq l \leq 15$ | $-32 \leq h \leq 32, -12 \leq k \leq 12, -29 \leq l \leq 30$ | $-20 \leq h \leq 20, -20 \leq k \leq 21, -36 \leq l \leq 36$ | $-11 \leq h \leq 11, -26 \leq k \leq 25, -27 \leq l \leq 27$ |
| reflections collected                | 44234                                                        | 20986                                                        | 71762                                                        | 34523                                                        |
| independent                          | 5375 ( <i>R</i> <sub>int</sub> : 0.0489,                     | 5775 ( <i>R</i> <sub>int</sub> : 0.0300,                     | 8750 ( <i>R</i> <sub>int</sub> : 0.0450,                     | 4322 ( <i>R</i> <sub>int</sub> : 0.1103,                     |

|                                         |                                    |                                    |                                    |                                    |
|-----------------------------------------|------------------------------------|------------------------------------|------------------------------------|------------------------------------|
| reflections                             | $R_{\text{sigma}}$ : 0.0292)       | $R_{\text{sigma}}$ : 0.0278)       | $R_{\text{sigma}}$ : 0.0263)       | $R_{\text{sigma}}$ : 0.0569)       |
| completeness to $\theta$                | 100%                               | 100%                               | 100%                               | 100%                               |
| data / restr. / param.                  | 5375 / 0 / 247                     | 5775 / 0 / 380                     | 8750 / 0 / 266                     | 4322 / 0 / 274                     |
| goodness-of-fit on $F^2$                | 1.085                              | 1.089                              | 1.369                              | 1.001                              |
| final R indices<br>[ $I > 2\sigma(I)$ ] | $R_1$ : 0.0236,<br>$wR_2$ : 0.0574 | $R_1$ : 0.0285,<br>$wR_2$ : 0.0725 | $R_1$ : 0.0316,<br>$wR_2$ : 0.0664 | $R_1$ : 0.0463,<br>$wR_2$ : 0.1139 |
| R indices (all data)                    | $R_1$ : 0.0260,<br>$wR_2$ : 0.587  | $R_1$ : 0.0330,<br>$wR_2$ : 0.0742 | $R_1$ : 0.0406,<br>$wR_2$ : 0.0692 | $R_1$ : 0.0921,<br>$wR_2$ : 0.1418 |
| extinction coefficient                  | 0.00084(13)                        | 0.00086(5)                         | 0.00024(4)                         | 0.0008(1)                          |
| larg. diff. peak & hole                 | 2.83/-1.58                         | 1.05/-2.26                         | 3.22/-2.55                         | 1.65/-3.4                          |
| CCDC                                    | 2141888                            | 2070867                            | 2070866                            | 2070868                            |

<sup>a</sup> From single crystal X-ray diffraction using Mo-K $\alpha$  ( $\lambda$  = 0.71073 Å) radiation for all except [Pt(dba)(PPh<sub>3</sub>)] and synchrotron ( $\lambda$  = 0.56076 Å) radiation for [Pt(dba)(PPh<sub>3</sub>)]. Least square refinement against  $|F|^2$ . <sup>b</sup> The structure of [Pt(dba)(dmsO)] was alternatively determined at 298(2) K with the same space group and very similar further parameters; CCDC: 2141889.

**Table S2.** Selected experimental structural data of [Pt(dba)(dmsO)], [Pt(dba)(PPh<sub>3</sub>)], [Pt(dba)(CN*t*Bu)], and [Pt(dba)(MeImd)].<sup>a</sup>

| distances / Å              | [Pt(dba)(dmsO)] | [Pt(dba)(PPh <sub>3</sub> )] | [Pt(dba)(CN <i>t</i> Bu)] | [Pt(dba)(MeImd)] |
|----------------------------|-----------------|------------------------------|---------------------------|------------------|
| Pt–N1                      | 1.986(2)        | 2.003(4)                     | 1.988(2)                  | 1.999(9)         |
| Pt–C1                      | 2.128(3)        | 2.105(5)                     | 2.085(3)                  | 2.115(1)         |
| Pt–C18                     | 2.093(2)        | 2.099(5)                     | 2.093(3)                  | 2.086(1)         |
| Pt–X                       | 2.191(1)        | 2.230(1)                     | 1.898(3)                  | 1.986(1)         |
| N1–C13                     | 1.342(3)        | 1.337(7)                     | 1.334(4)                  | 1.337(1)         |
| N1–C10                     | 1.342(3)        | 1.333(5)                     | 1.337(4)                  | 1.352(1)         |
| C13–C17                    | 1.424(3)        | 1.440(6)                     | 1.425(4)                  | 1.393(1)         |
| C10–C6                     | 1.423(3)        | 1.420(6)                     | 1.429(4)                  | 1.422(1)         |
| C17–C18                    | 1.428(3)        | 1.431(7)                     | 1.435(4)                  | 1.442(1)         |
| C6–C1                      | 1.436(4)        | 1.439(6)                     | 1.431(4)                  | 1.427(1)         |
| angles / °                 |                 |                              |                           |                  |
| C1–Pt–C18                  | 158.87(9)       | 158.6(2)                     | 159.6(1)                  | 159.1(4)         |
| X–Pt–N1                    | 173.18(7)       | 176.2(1)                     | 177.6(1)                  | 177.8(4)         |
| N1–Pt–C1                   | 79.1(1)         | 79.2(2)                      | 80.1(1)                   | 79.8(4)          |
| N1–Pt–C18                  | 79.92(9)        | 79.5(2)                      | 79.5(1)                   | 79.3(4)          |
| C1–Pt–X                    | 106.62(8)       | 104.5(1)                     | 97.5(1)                   | 101.9 (4)        |
| C18–Pt–X                   | 94.47(7)        | 96.8(1)                      | 102.9(1)                  | 98.9(4)          |
| dihedral angles            |                 |                              |                           |                  |
| C1–Pt–X–Y                  | 129.9(1)        | –12.1(2)                     | 123.1(1)                  | 123.2(10)        |
| C18–Pt–X–Y                 | –51.4(1)        | 169.7(2)                     | 92.09(5)                  | –57.9(10)        |
| N1–Pt–X–Y                  | –17.0(6)        | –174.4(2)                    | 163.3(5)                  | –93.2(10)        |
| N1–C10–C6–C5               | 176.3(2)        | –178.9(4)                    | –2.0(1)                   | 178.8(9)         |
| N1–C13–C17–C16             | –179.4(2)       | 177.5(4)                     | 0.8(1)                    | 179.9(9)         |
| N1–C10–C9–C8               | –177.7(2)       | –179.9(4)                    | –178.9(9)                 | –178.9(9)        |
| C14–C12–C11–C9             | –179.5(3)       | –177.5(5)                    | –178.8(1)                 | –178.8(11)       |
| Sum of $\Lambda$ around Pt | 360.1           | 360.0                        | 360.0                     | 359.9            |

<sup>a</sup> From single crystal X-ray diffraction, see Table S1.



**Table S3.** Electrochemical data of the Pt(II) complexes.<sup>a</sup>

| [Pt(dba)(L)]            | Red            |                |                    | Ox           | gap               |
|-------------------------|----------------|----------------|--------------------|--------------|-------------------|
|                         | $E_{1/2}$ Red2 | $E_{1/2}$ Red1 | $\Delta$ Red1–Red2 | $E_{pa}$ Ox1 | $\Delta$ Ox1–Red1 |
| L = Me <sub>2</sub> Imd | –3.02 (irr)    | –2.10          | 0.92               | 0.55         | 2.65              |
| L = PPh <sub>3</sub>    | –2.70 (irr)    | –1.96          | 0.74               | 0.75         | 2.71              |
| L = CN <i>t</i> Bu      | –3.26          | –1.89          | 1.37               | 0.80         | 2.69              |
| L = dmsO                | –2.70 (irr)    | –1.98 (irr)    | 0.72               | 0.93         | 2.91              |
| [Pt(db(ph)a)(dmsO)]     | –2.52 (irr)    | –1.89          | 0.63               | 1.00         | 2.89              |

<sup>a</sup> From cyclic voltammetry in *n*Bu<sub>4</sub>NPF<sub>6</sub>/THF (tetrahydrofuran). Potentials in V vs. ferrocene/ferrocenium; half-wave potentials ( $E_{1/2}$ ) for reversible processes; cathodic peak potentials ( $E_{pc}$ ) for irreversible reductions (irr); accuracy of potentials:  $\pm 0.003$  V.

**Table S4.** Experimental long-wavelength absorption maxima of the Pt(II) complexes.<sup>a</sup>

| [Pt(dba)(L)]        |                      |                      |                 |                      |                 |                     |                 |                     |         |
|---------------------|----------------------|----------------------|-----------------|----------------------|-----------------|---------------------|-----------------|---------------------|---------|
| L =                 | $\lambda_1$ (ε)      | $\lambda_2$ (ε)      | $\lambda_3$ (ε) | $\lambda_4$ (ε)      | $\lambda_5$ (ε) | $\lambda_6$ (ε)     | $\lambda_7$ (ε) | $\lambda_8$ (ε)     | cut-off |
| dmsO                | <u>280</u><br>(32.0) | <u>292</u><br>(47.8) | 324<br>(10.5)   | <u>340</u><br>(8.3)  | 387<br>(3.7)    | <u>409</u><br>(4.1) | 491<br>(1.7)    | <u>525</u><br>(1.9) | 566     |
| PPh <sub>3</sub>    | <u>285</u><br>(50.1) | <u>296</u><br>(50.2) | 332<br>(11.6)   | <u>347</u><br>(12.7) | 387<br>(6.0)    | <u>409</u><br>(6.2) | 502<br>(1.6)    | <u>532</u><br>(2.1) | 577     |
| CN <i>t</i> Bu      | 280<br>(22.1)        | <u>294</u><br>(27.0) | 326<br>(5.7)    | <u>343</u><br>(5.2)  | 387<br>(2.2)    | <u>408</u><br>(2.4) | 501<br>(0.8)    | <u>533</u><br>(1.0) | 568     |
| Me <sub>2</sub> Imd | <u>287</u><br>(45.5) | 300<br>(24.8)        | 338<br>(7.9)    | <u>352</u><br>(8.9)  | 393<br>(3.8)    | <u>406</u><br>(3.2) | 507<br>(1.0)    | <u>536</u><br>(1.3) | 580     |
| [Pt(db(ph)a)(dmsO)] |                      | 293 (39)             |                 | <u>346</u><br>(6.8)  |                 |                     |                 | <u>533</u><br>(1.4) |         |

<sup>a</sup> Measured in CH<sub>2</sub>Cl<sub>2</sub>. <sup>b</sup> Wavelength  $\lambda$  in nm, molar absorption coefficient  $\epsilon$  (in 10<sup>3</sup> M<sup>–1</sup> cm<sup>–1</sup>), main maxima are underlined.

**Table S5.** Selected absorption maxima of the oxidized, parent, and reduced [Pt(dba)(L)]<sup>+0/–</sup> complexes.<sup>a</sup>

| L =                 | charge           | $\lambda_1$ | $\lambda_2$ | $\lambda_3$ | $\lambda_4$ | $\lambda_5$ | $\lambda_6$ | $\lambda_7$ | $\lambda_8$ | $\lambda_9$ | $\lambda_{10}$ | $\lambda_{11}$ |
|---------------------|------------------|-------------|-------------|-------------|-------------|-------------|-------------|-------------|-------------|-------------|----------------|----------------|
| dmsO                | [ ] <sup>+</sup> | -           | <u>236</u>  | -           | <u>291</u>  | 338         |             | <u>409</u>  | -           | -           | <u>525</u>     | -              |
| PPh <sub>3</sub>    | [ ] <sup>+</sup> | -           | 227         | <u>266</u>  | <u>315</u>  | -           | -           | -           | -           | <u>451</u>  | -              | 640            |
| CN <i>t</i> Bu      | [ ] <sup>+</sup> | -           | <u>231</u>  | <u>281</u>  | <u>307</u>  | -           | -           | <u>405</u>  | -           | <u>446</u>  | -              | -              |
| Me <sub>2</sub> Imd | [ ] <sup>+</sup> | -           | -           | <u>278</u>  | -           | <u>374</u>  | -           | <u>395</u>  | <u>432</u>  | -           | -              |                |
| dmsO                | [ ]              | -           | <u>235</u>  | <u>292</u>  | -           | 340         | 387         | <u>409</u>  | -           | 496         | <u>529</u>     | -              |
| PPh <sub>3</sub>    | [ ]              | 230         | <u>285</u>  | 296         | 332         | <u>348</u>  | <u>388</u>  | <u>410</u>  | -           | -           | <u>533</u>     | -              |
| CN <i>t</i> Bu      | [ ]              | 218         | <u>235</u>  | 281         | <u>294</u>  | <u>346</u>  | -           | <u>409</u>  | -           | -           | <u>538</u>     | -              |
| Me <sub>2</sub> Imd | [ ]              | -           | -           | <u>287</u>  | -           | <u>353</u>  | -           | <u>394</u>  | -           | -           | <u>545</u>     |                |
| dmsO                | [ ] <sup>–</sup> | <u>216</u>  | 246         | <u>284</u>  | -           | <u>350</u>  | -           | <u>406</u>  | <u>438</u>  | -           | -              | <u>660</u>     |
| PPh <sub>3</sub>    | [ ] <sup>–</sup> | 224         | -           | -           | -           | 348         | <u>363</u>  | <u>411</u>  | <u>437</u>  |             | <u>530</u>     | -              |
| CN <i>t</i> Bu      | [ ] <sup>–</sup> | 214         | -           | 280         | 325         | 355         | -           | -           | <u>436</u>  | -           | -              | 570            |
| Me <sub>2</sub> Imd | [ ] <sup>–</sup> | -           | <u>250</u>  | -           | 327         | -           | -           | 394         | 431         | -           | 545            | <u>640</u>     |

<sup>a</sup> Measured in THF/*n*-Bu<sub>4</sub>NPF<sub>6</sub>, wavelength  $\lambda$  in nm, main maxima are underlined.

## Part II

### contents

- Figure S31.** 600 MHz  $^1\text{H}$  NMR spectra of  $[\text{Pt}(\text{dba})(\text{PPh}_3)]$  in  $\text{CD}_2\text{Cl}_2$ .  
**Figure S32.** 600 MHz  $^{31}\text{P}$  NMR spectrum of  $[\text{Pt}(\text{dba})(\text{PPh}_3)]$  in  $\text{CD}_2\text{Cl}_2$ .  
**Figure S33.** 600 MHz H,H COSY NMR spectrum of  $[\text{Pt}(\text{dba})(\text{PPh}_3)]$  in  $\text{CD}_2\text{Cl}_2$ .  
**Figure S34.** 600 MHz H,H NOESY NMR spectrum of  $[\text{Pt}(\text{dba})(\text{PPh}_3)]$  in  $\text{CD}_2\text{Cl}_2$ .  
**Figure S35.** 600 MHz  $^1\text{H}$  NMR spectrum of  $[\text{Pt}(\text{dba})(\text{CN}t\text{Bu})]$  in  $\text{CD}_2\text{Cl}_2$ .  
**Figure S36.** 300 MHz  $^{13}\text{C}$ - $^{135}\text{Pt}$ -DEPTQ- $^1\text{H}$  NMR spectra of  $[\text{Pt}(\text{dba})(\text{CN}t\text{Bu})]$  in  $\text{CD}_2\text{Cl}_2$ .  
**Figure S37.** 600 MHz H,H COSY NMR spectrum of  $[\text{Pt}(\text{dba})(\text{CN}t\text{Bu})]$  in  $\text{CD}_2\text{Cl}_2$ .  
**Figure S38.** 600 MHz  $^1\text{H}$  NMR spectrum of  $[\text{Pt}(\text{dba})(\text{Me}_2\text{Imd})]$  in  $\text{CD}_2\text{Cl}_2$ .  
**Figure S39.** 300 MHz  $^{13}\text{C}$ - $^{135}\text{Pt}$ -DEPTQ- $^1\text{H}$  NMR spectra of  $[\text{Pt}(\text{dba})(\text{Me}_2\text{Imd})]$  in  $\text{CD}_2\text{Cl}_2$ .  
**Figure S40.** 600 MHz H,H COSY NMR spectrum of  $[\text{Pt}(\text{dba})(\text{Me}_2\text{Imd})]$  in  $\text{CD}_2\text{Cl}_2$ .  
**Figure S41.** 300 MHz  $^1\text{H}$ - $^{195}\text{Pt}$ -HMBC NMR spectrum of  $[\text{Pt}(\text{dba})(\text{Me}_2\text{Imd})]$  in  $\text{CD}_2\text{Cl}_2$ .  
**Figure S42.** ESI-MS(+) of  $[\text{Pt}(\text{dba})(\text{PPh}_3)]$ .  
**Figure S43.** ESI-MS(+) of  $[\text{Pt}(\text{dba})(\text{CN}t\text{Bu})]$ .  
**Figure S44.** EI-MS(+) of  $[\text{Pt}(\text{dba})(\text{Me}_2\text{Imd})]$ .

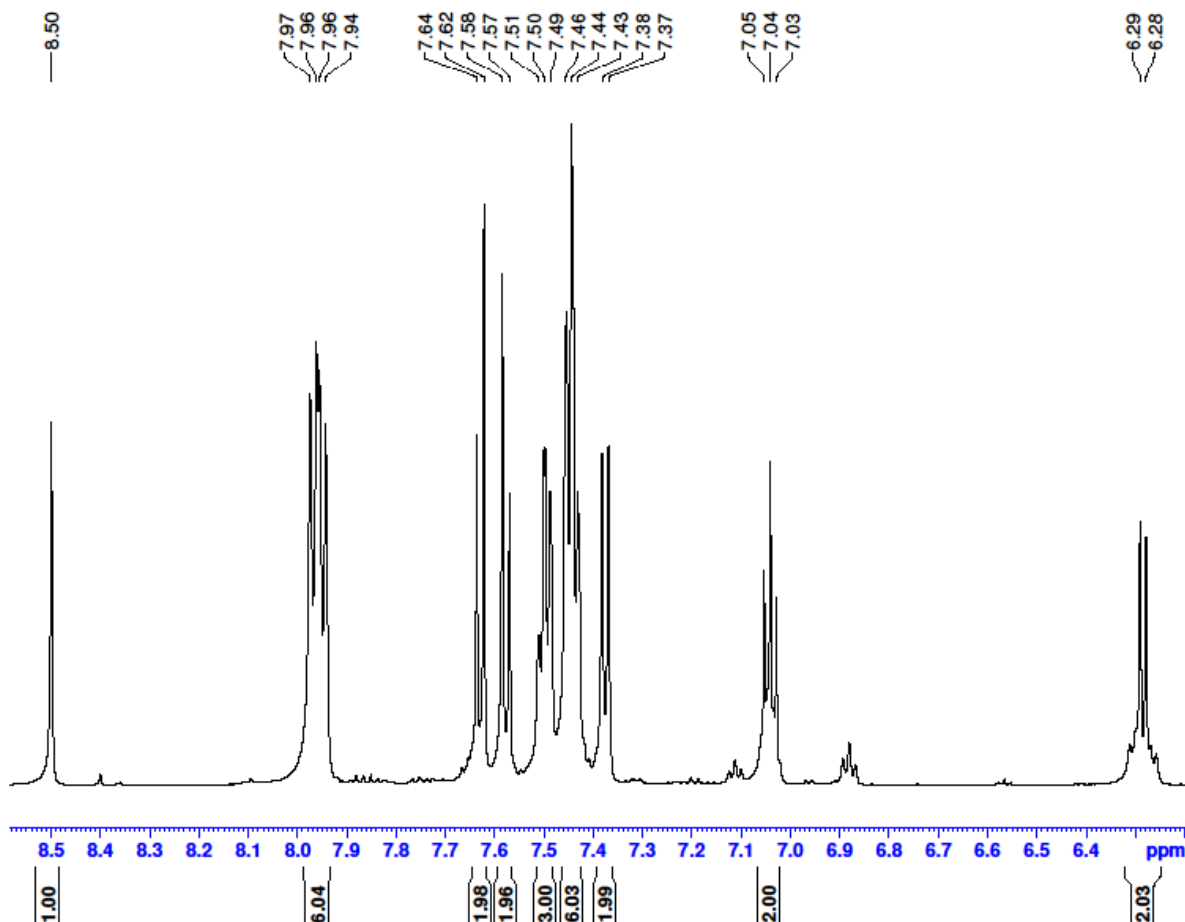

**Figure S31.** 600 MHz  $^1\text{H}$  NMR spectrum of  $[\text{Pt}(\text{dba})(\text{PPh}_3)]$  in  $\text{CD}_2\text{Cl}_2$ .

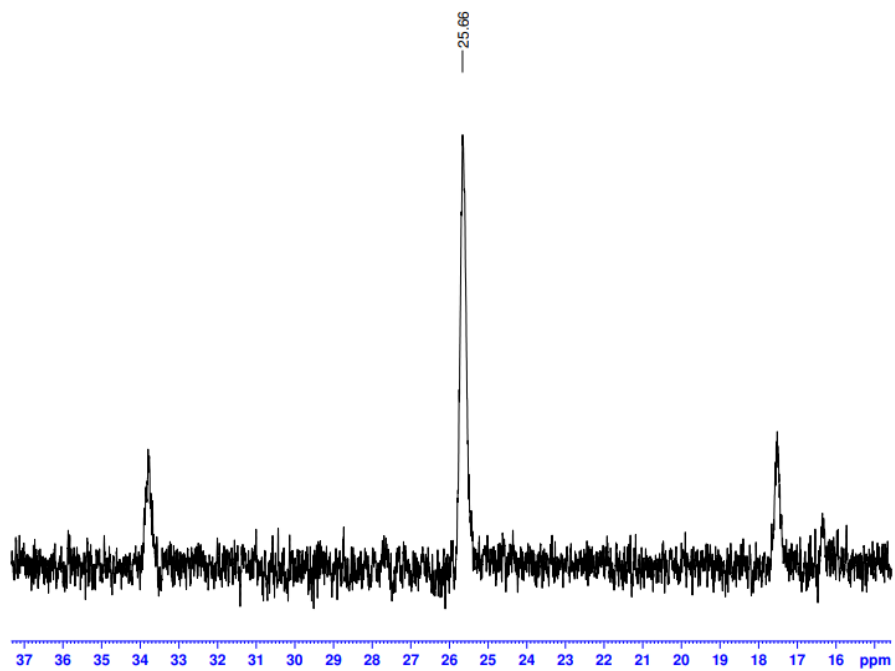

Figure S32 600 MHz  $^{31}\text{P}$  NMR spectrum of  $[\text{Pt}(\text{dba})(\text{PPh}_3)]$  in  $\text{CH}_2\text{Cl}_2$ .

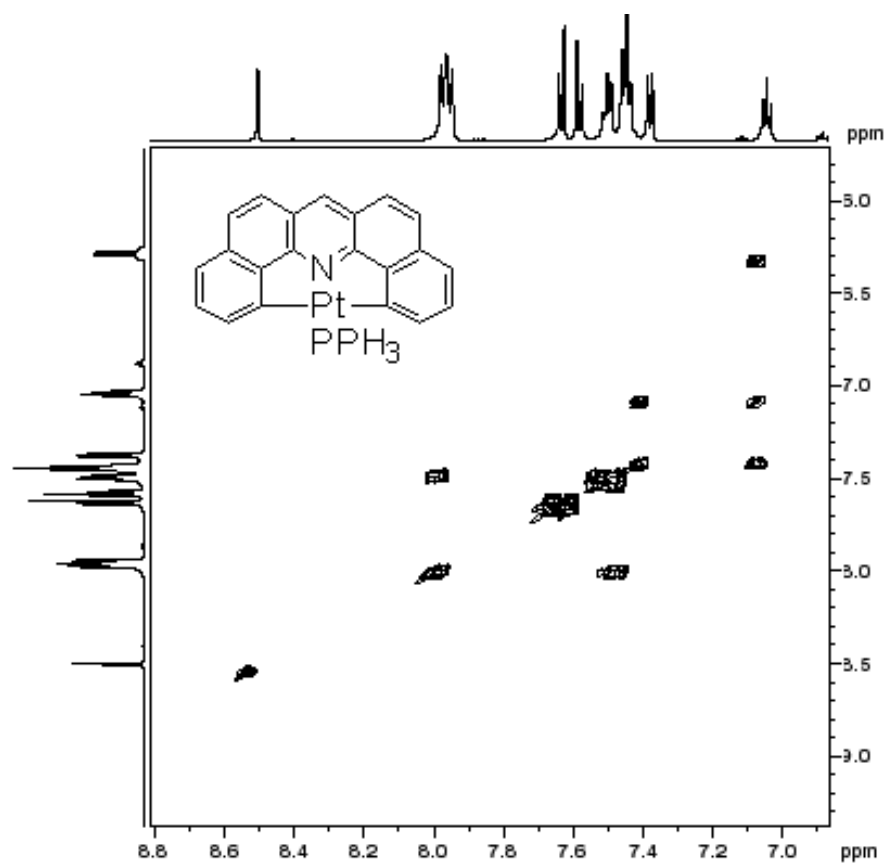

Figure S33. 600 MHz  $^1\text{H}/^1\text{H}$  COSY NMR spectrum of  $[\text{Pt}(\text{dba})(\text{PPh}_3)]$  in  $\text{CD}_2\text{Cl}_2$ .

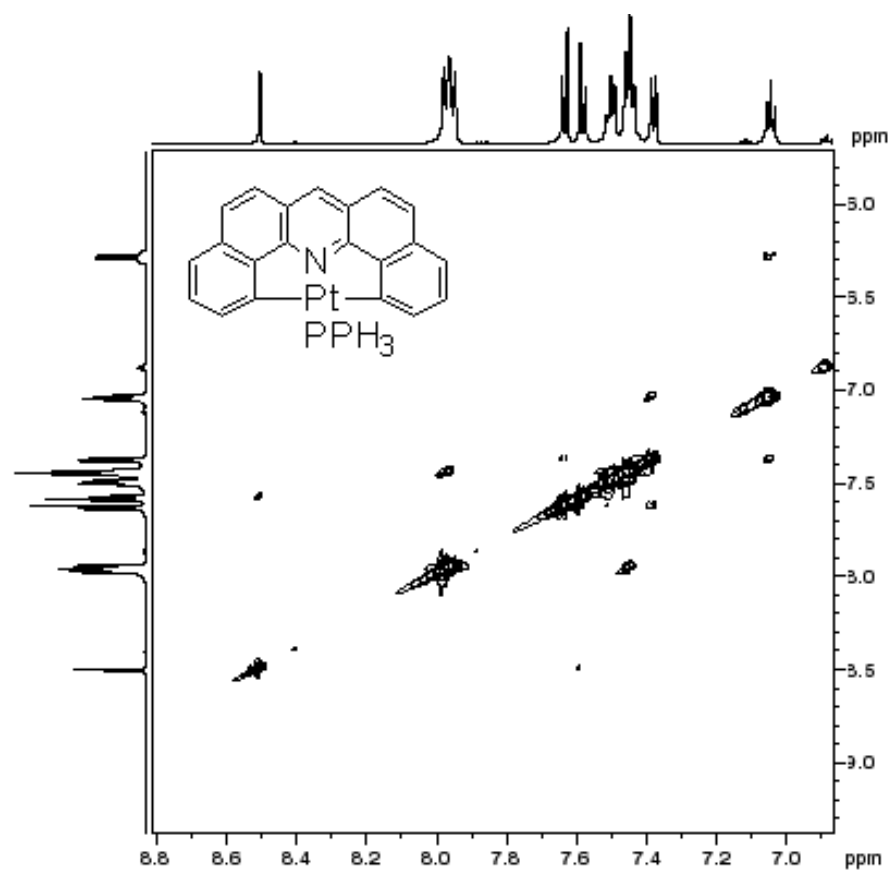

**Figure S34.** 600 MHz  $^1\text{H}$ - $^1\text{H}$  NOESY NMR spectrum of  $[\text{Pt}(\text{dba})(\text{PPh}_3)]$  in  $\text{CH}_2\text{Cl}_2$ .

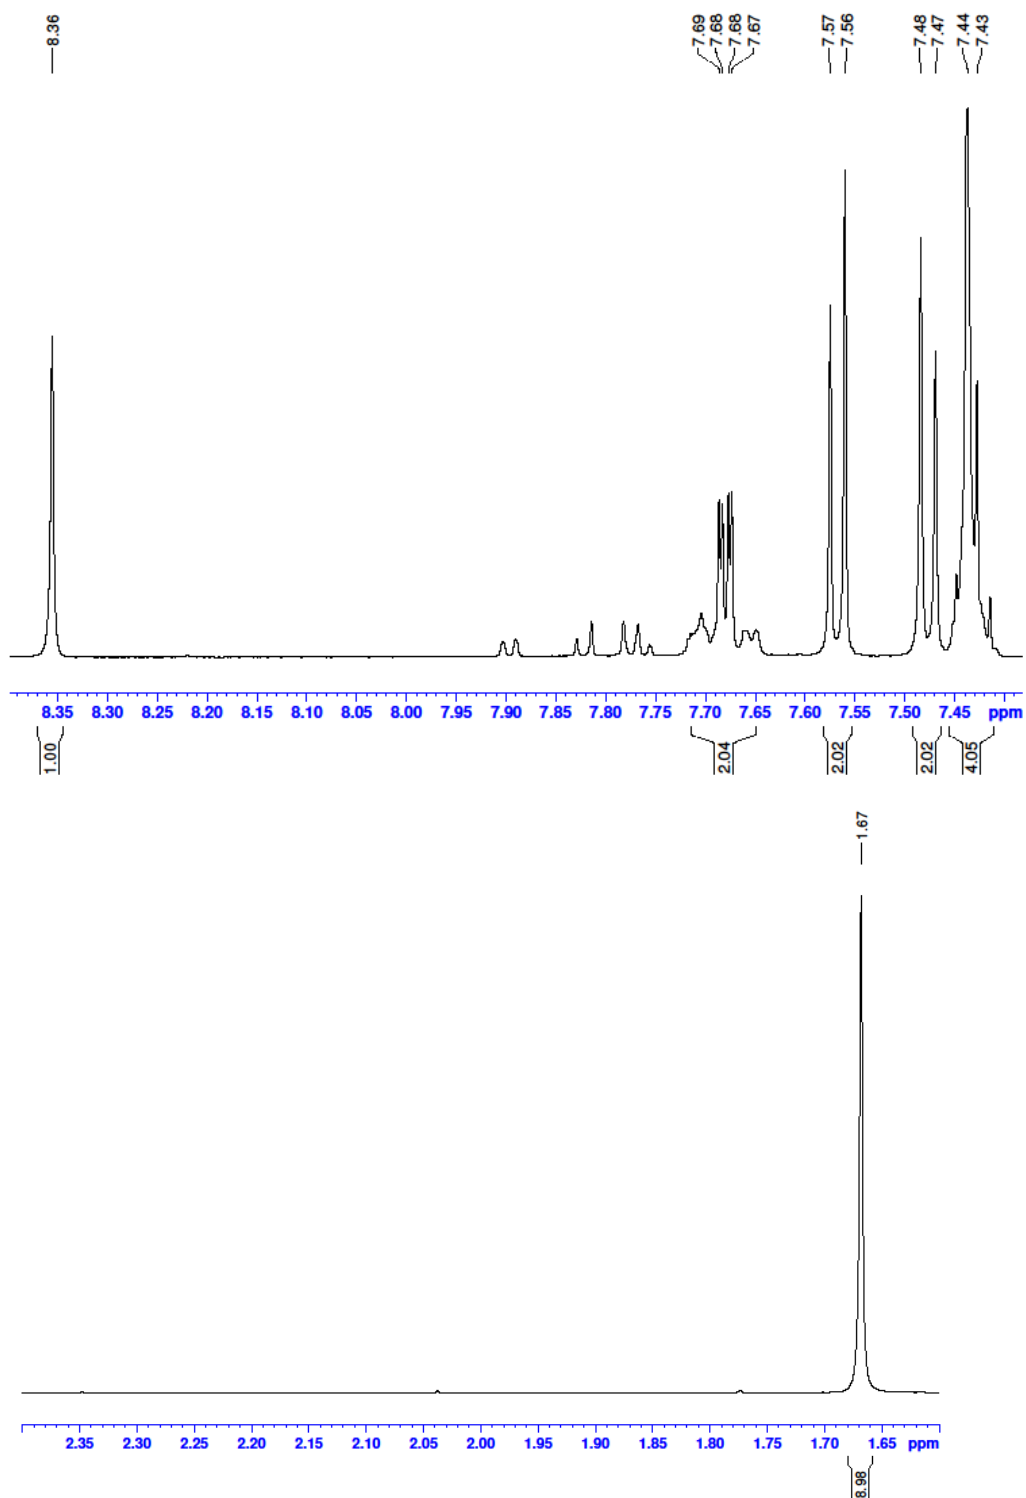

**Figure S35.** 600 MHz <sup>1</sup>H NMR spectra of [Pt(dba)(CN*t*Bu)] in CD<sub>2</sub>Cl<sub>2</sub>.

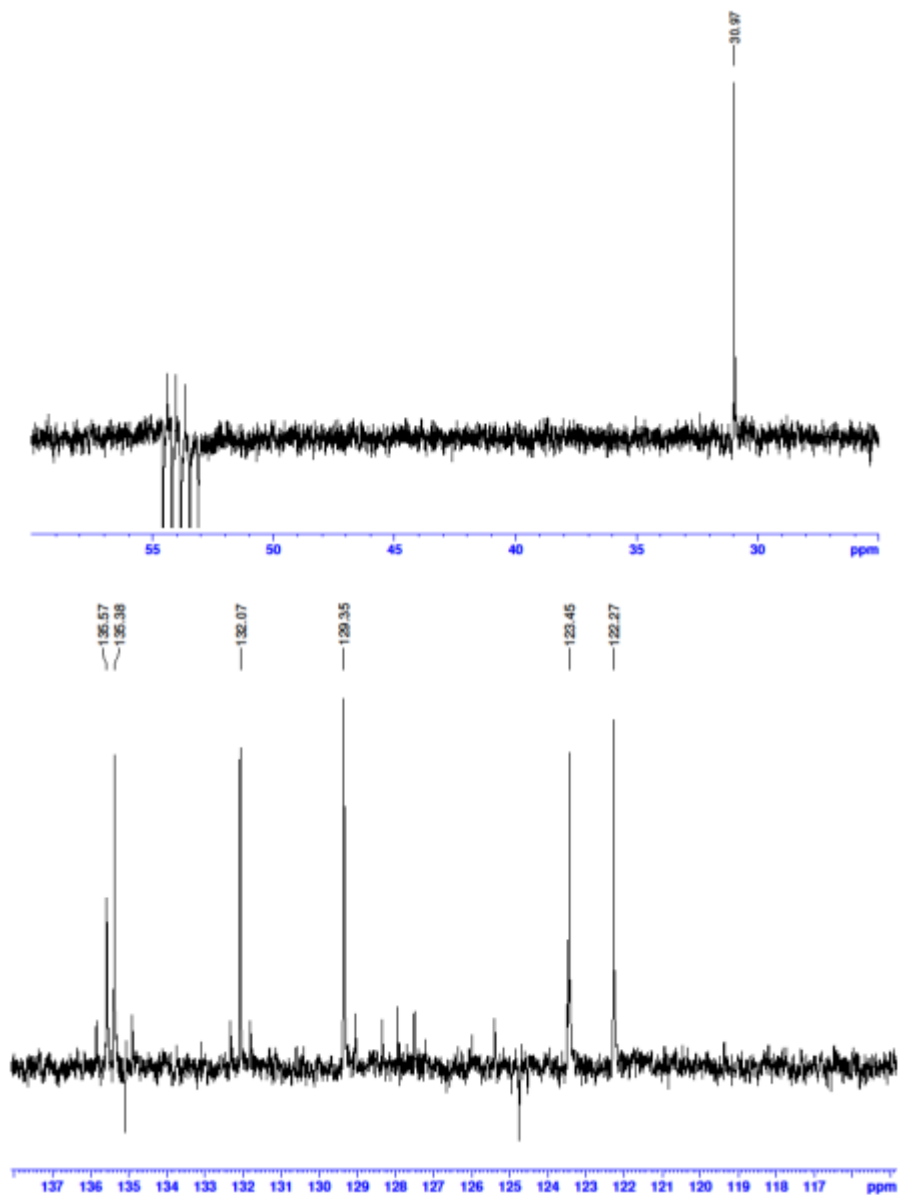

**Figure S36.** 300 MHz  $^{13}\text{C}$ - $^{135}\text{DEPTQ}$ - $[\text{H}]$  NMR spectra of  $[\text{Pt}(\text{dba})(\text{CN}t\text{Bu})]$  in  $\text{CD}_2\text{Cl}_2$ .



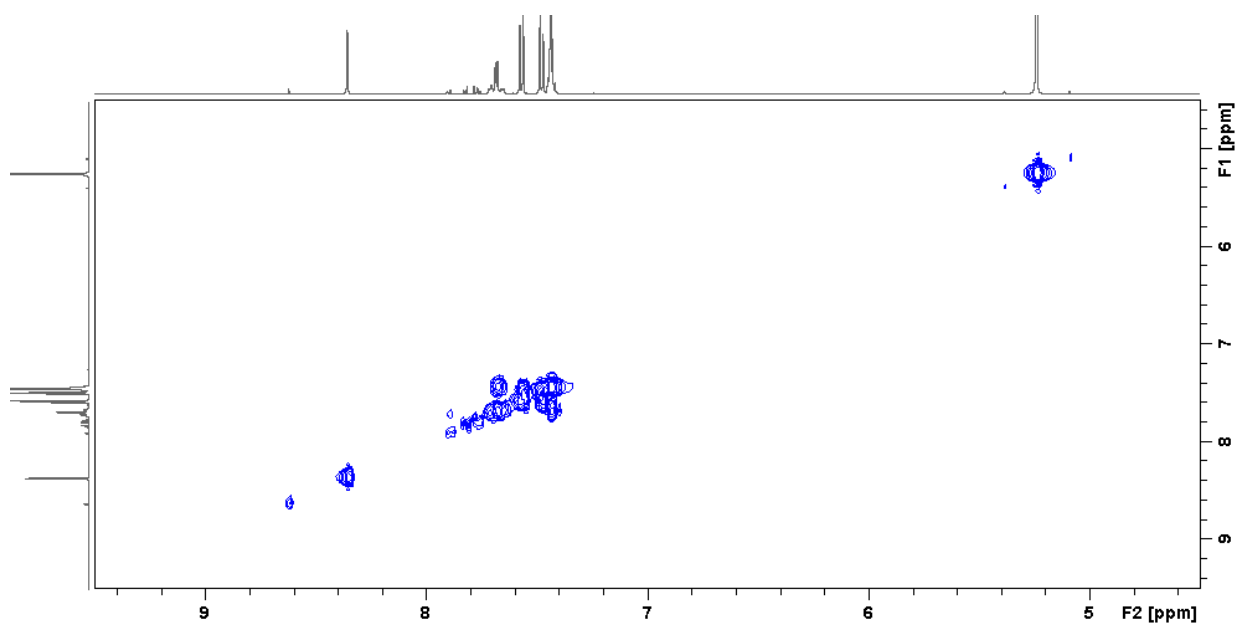

**Figure S37.** 600 MHz  $^1\text{H}$ , $^1\text{H}$  COSY NMR of  $[\text{Pt}(\text{dba})(\text{CN}^t\text{Bu})]$  in  $\text{CD}_2\text{Cl}_2$ .

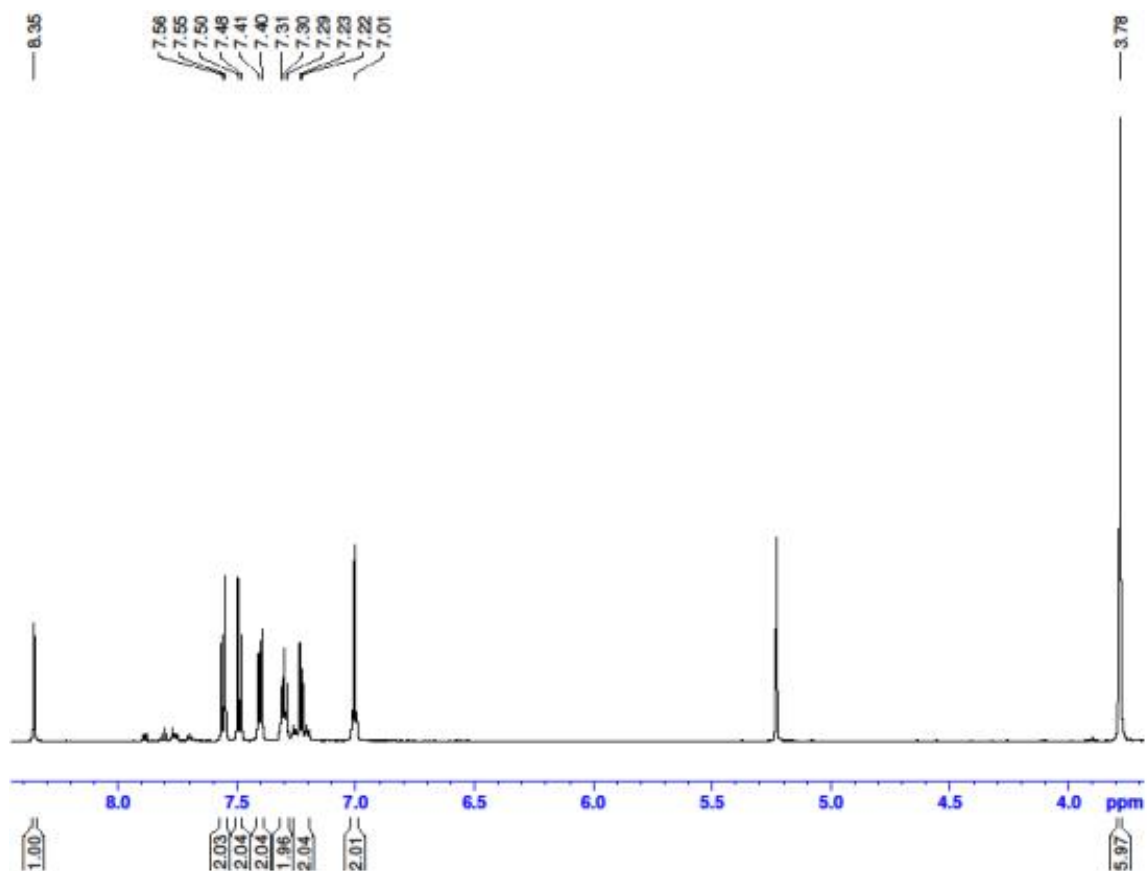

**Figure S38.** 600 MHz  $^1\text{H}$  NMR spectrum of  $[\text{Pt}(\text{dba})(\text{Me}_2\text{Imd})]$  in  $\text{CD}_2\text{Cl}_2$ .

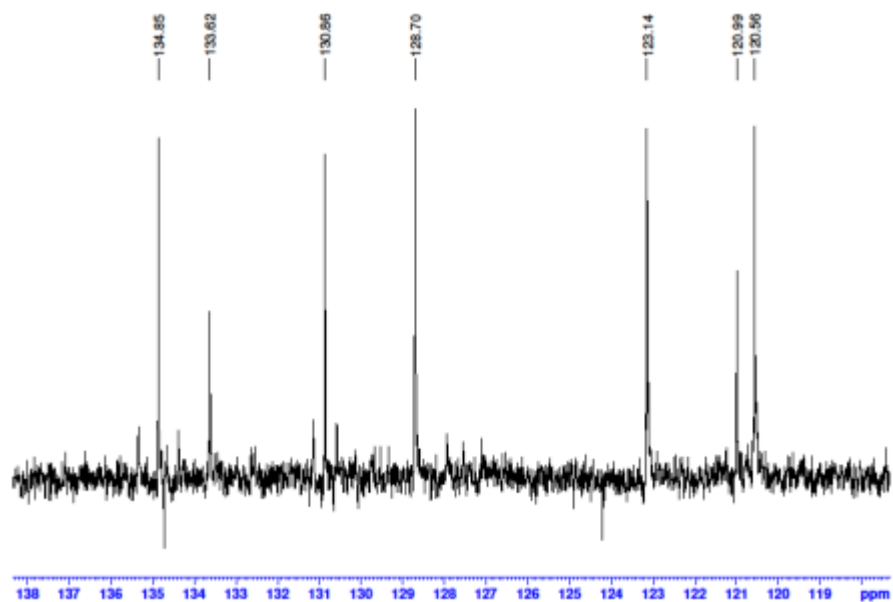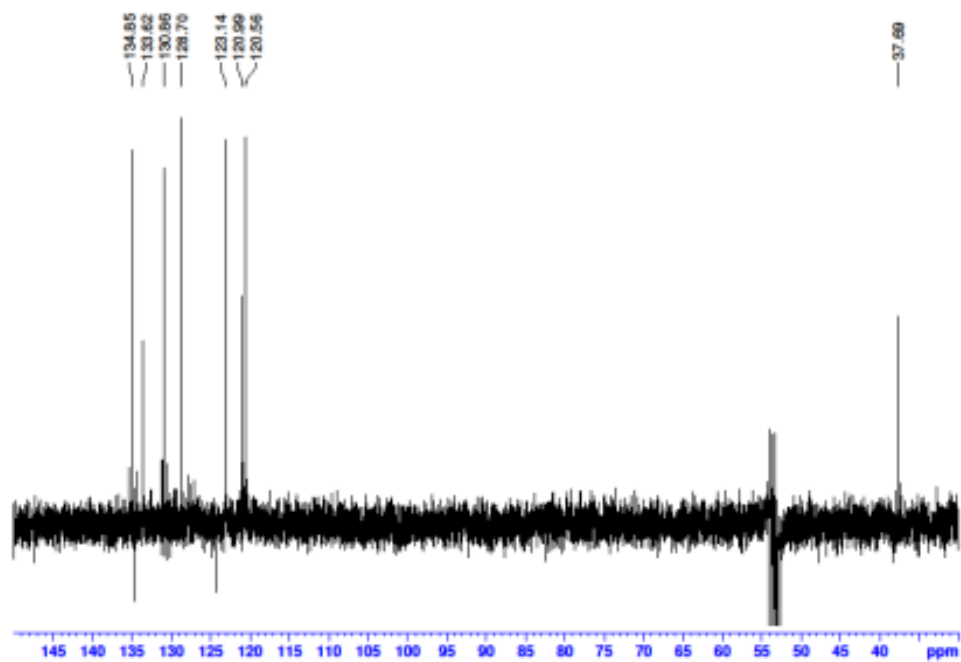

Figure S39. 300 MHz  $^{13}\text{C}$ -135-DEPTQ- $^1\text{H}$  NMR spectrum of  $[\text{Pt}(\text{dba})(\text{CN}t\text{Bu})]$  in  $\text{CD}_2\text{Cl}_2$ .

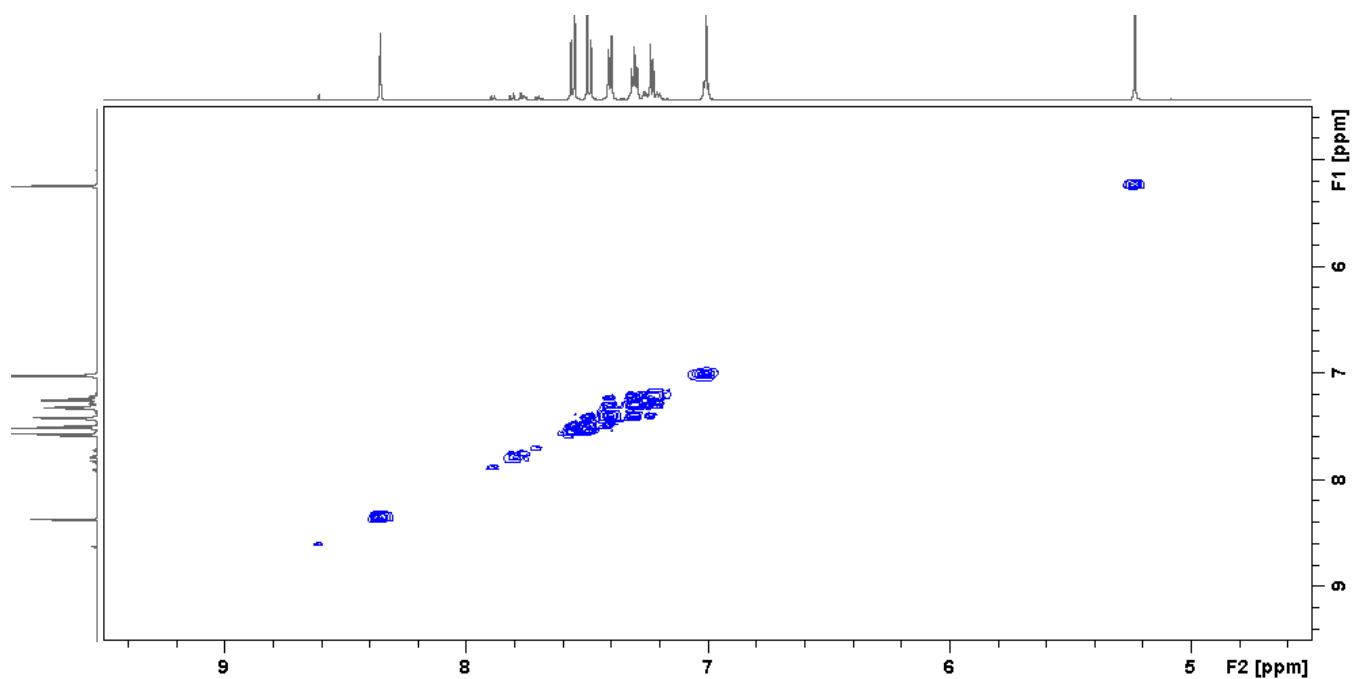

**Figure S40.** 600 MHz  $^1\text{H}$ - $^1\text{H}$  COSY NMR of  $[\text{Pt}(\text{dba})(\text{Me}_2\text{Imd})]$  in  $\text{CD}_2\text{Cl}_2$ .

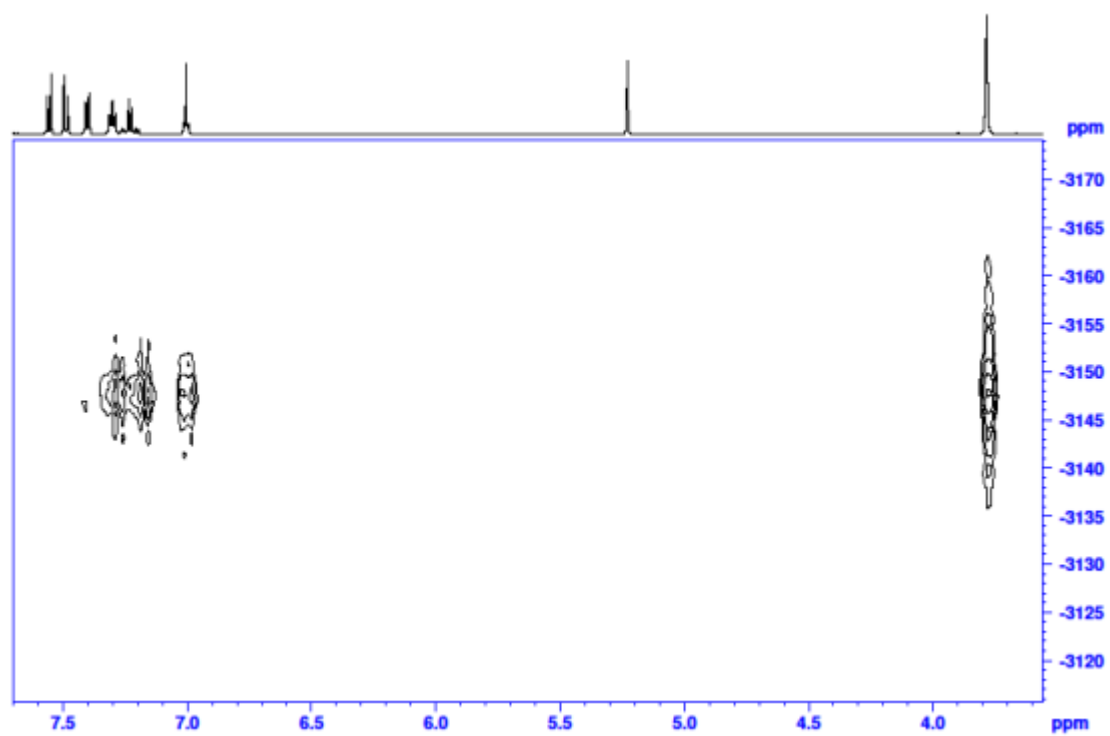

**Figure S41.** 300 MHz  $^1\text{H}$ - $^{195}\text{Pt}$ -HMBC NMR spectrum of  $[\text{Pt}(\text{dba})(\text{Me}_2\text{Imd})]$  in  $\text{CD}_2\text{Cl}_2$ .

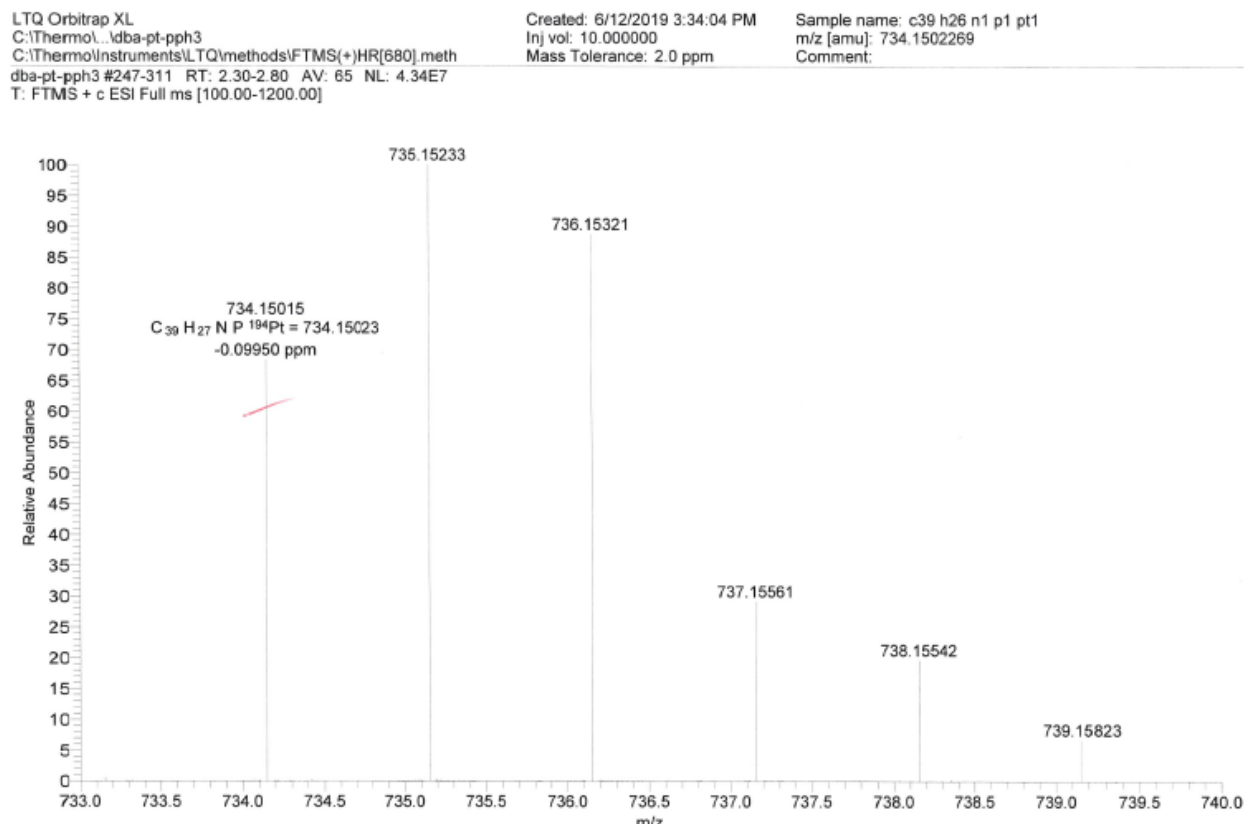

Figure S42. ESI-MS(+) of [Pt(dba)(PPh<sub>3</sub>)].

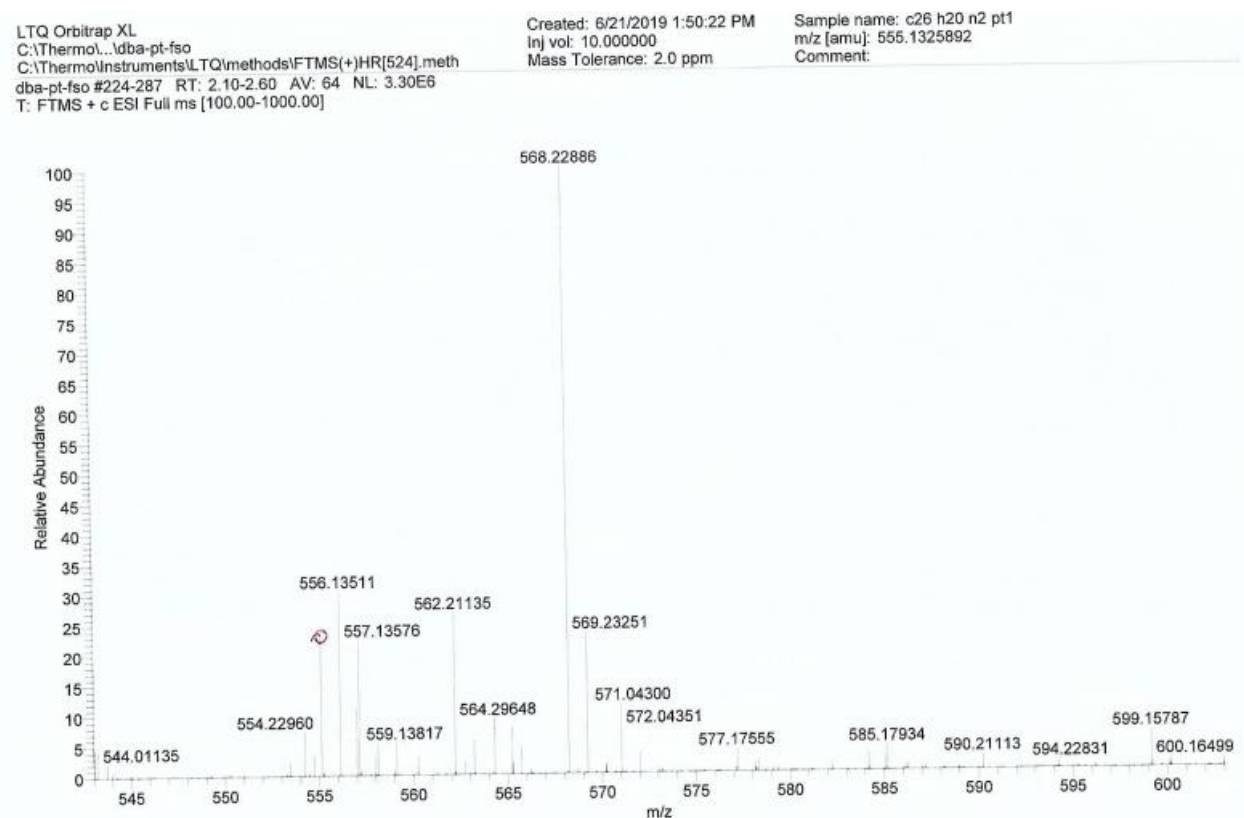

Figure S43. ESI-MS(+) of [Pt(dba)(CN*t*Bu)].

SPEC: kle4551 03-Sep-20 Elapse: 08:01.7 70  
 Samp: Friedel neu gemessen Start : 09:11:55 71  
 Comm: EI pos 70eV  
 Mode: EI +VE +LMR BSCAN (EXP) UP LR NRM  
 Oper: A. Baum Client: J.N. Friedel Inlet :  
 Base: 567.8 Inten : 5958442 Masses: 16 > 700  
 Norm: 567.8 RIC : 49085039 #peaks: 747  
 Peak: 1000.00 mmu

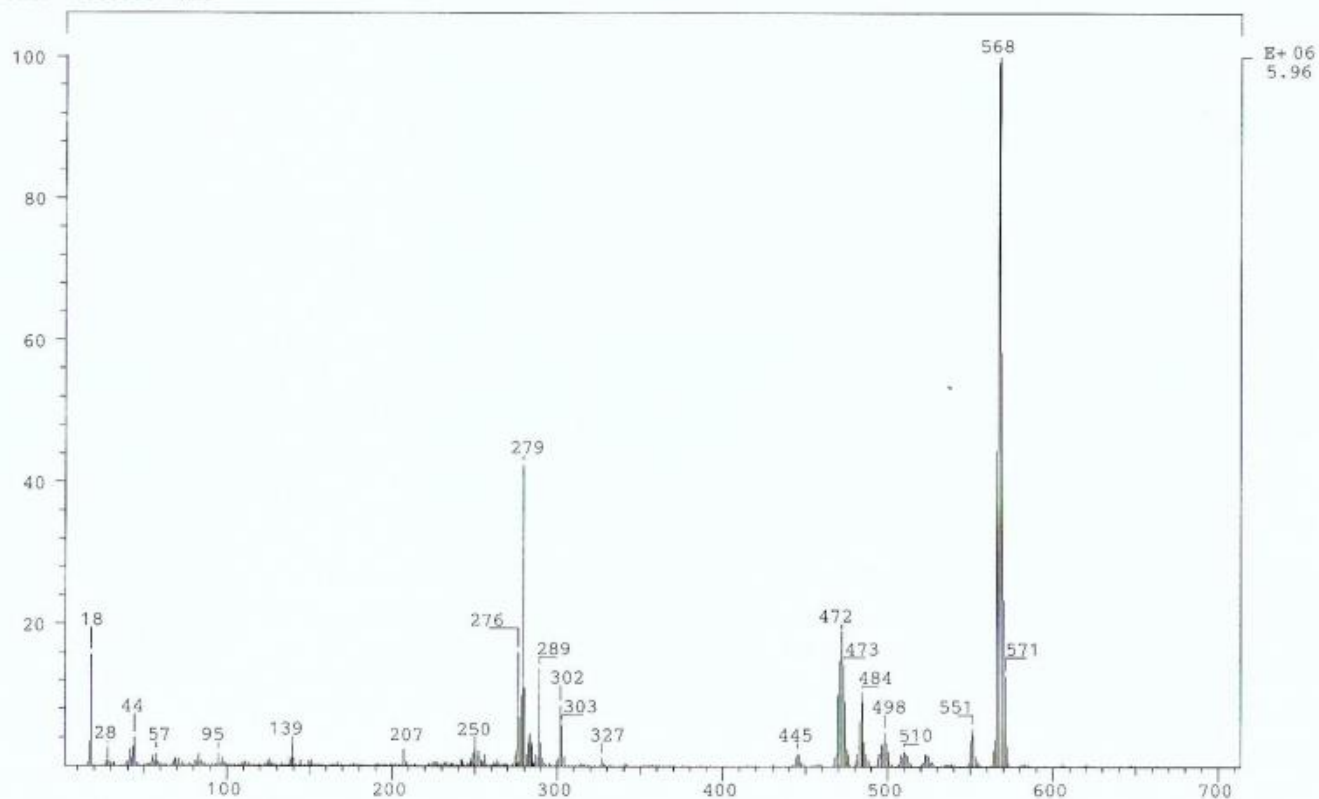

Figure S44. EI-MS(+) of [Pt(dba)(Me<sub>2</sub>Imd)].
